# 1 Does land use matter? Carbon consequences of alternative land use futures in 2 New England

3  
4 Meghan Graham MacLean\*<sup>1,2</sup>, Matthew Duveneck<sup>1,3</sup>, Joshua Plisinski<sup>1</sup>, Luca Morreale<sup>1,4</sup>,  
5 Danelle Laflower<sup>1</sup>, Jonathan Thompson<sup>1</sup>

6  
7 <sup>1</sup>Harvard Forest, Harvard University, Petersham, MA

8 <sup>2</sup>Department of Environmental Conservation, University of Massachusetts – Amherst, Amherst  
9 MA

10 <sup>3</sup>New England Conservatory, Boston, MA

11 <sup>4</sup>Department of Earth & Environment, Boston University, Boston, MA

12  
13 \*mgmaclean@umass.edu

## 14 15 ABSTRACT

16 Globally, forests play an important role in climate change mitigation. However, land-use  
17 impacts the ability of forests to sequester and store carbon. Here we quantify the impacts of  
18 five divergent future land-use scenarios on aboveground forest carbon stocks and fluxes  
19 throughout New England. These scenarios, four co-designed with stakeholders from  
20 throughout the region and the fifth a continuation of recent trends in land use, were simulated  
21 by coupling a land cover change model with a mechanistic forest growth model to produce  
22 estimates of aboveground carbon over 50 years. Future carbon removed through harvesting  
23 and development was tracked using a standard carbon accounting methodology, modified to fit  
24 our modeling framework. Of the simulated changes in land use, changes in harvesting had the  
25 most profound and immediate impacts on carbon stocks and fluxes. In one of the future land-  
26 use scenarios including a rapid expansion of harvesting for biomass energy, this changed New  
27 England's forests from a net carbon sink to a net carbon source in 2060. Also in these  
28 simulations, relatively small reductions in harvest intensities (e.g., 10% reduction), coupled with  
29 an increased percent of wood going into longer-term storage, led to substantial reductions in  
30 net carbon emissions (909 MMtCO<sub>2</sub>eq) as compared to a continuation of recent trends in land  
31 use. However, these projected gains in carbon storage and reduction in emissions from less  
32 intense harvesting regimes can only be realized if it is paired with a reduction in the  
33 consumption of the timber products, and their replacements, that otherwise would result in  
34 additional emissions from leakage and substitution.

35  
36 Key Words: carbon accounting, land use, scenario planning, LANDIS-II, PnET

## 37 38 INTRODUCTION

39 Forest carbon plays a key role in regulating the climate system (Houghton et al. 2012, Williams  
40 et al. 2012, Reinmann et al. 2016, Ma et al. 2020, Finzi et al. 2020). Forest land use, including  
41 timber harvest and conversion for developed uses, has significant impacts on forest carbon  
42 dynamics and, thus, future land use has the potential to mitigate or exacerbate climate change  
43 (Pan et al. 2011, Butler et al. 2015, Woodall et al. 2015, Le Quéré et al. 2018). Mechanistic

44 models of forest carbon dynamics, coupled to simulations of co-designed land-use scenarios,  
45 offer a robust approach to identifying and planning for sustainable land-use pathways.

46 Like much of the global temperate forest biome, the northeastern U.S. has significant  
47 capacity to increase its forest carbon stocks through natural regrowth (Cook-Patton et al.  
48 2020a). Continued forest growth and recovery from Colonial-era land use remains the most  
49 significant driver of aboveground carbon dynamics in this region (Thompson et al. 2013, Puhlick  
50 et al. 2017, Duveneck et al. 2017). However, the ability of the region to continue to serve as a  
51 carbon sink is threatened by the current land-use regime. Since the 1980s, land-use and land-  
52 cover (LULC) change, particularly the expansion of low-density residential development, has  
53 resulted in the net loss of approximately 387,000 ha of forest cover across the six New England  
54 states (Olofsson et al. 2016), reducing stocks and the capacity for future terrestrial carbon  
55 sequestration (Reinmann et al. 2016, Thompson et al. 2017b). If rates and spatial patterns of  
56 forest conversion continue as they have from 1990-2010 through 2050, an additional 0.5  
57 million ha of forest land could be lost to development with consequential impacts to carbon  
58 storage and sequestration (Thompson et al. 2017b). Even more importantly, despite recent  
59 reductions in timber harvesting throughout much of southern New England (Kittredge et al.  
60 2017), harvesting remains the primary driver of mature tree mortality and carbon loss  
61 throughout the region (Canham et al. 2013, Harris et al. 2016, Thompson et al. 2017a, Ma et al.  
62 2020). Therefore, it is important to understand how changes in future land-use patterns,  
63 including both development and harvesting, affect the total carbon storage in New England's  
64 forests and elsewhere.

65 Understanding the carbon impacts of future land-use choices in a heavily forested and  
66 heavily populated region, such as New England, can help guide future policy and land use, but  
67 anticipating the future conditions of regional ecosystems where small private landowners  
68 dominate is challenging. Sixty-five percent of New England forests are owned and managed by  
69 more than 200,000 family forest owners, each making land-use decisions based on their own  
70 priorities (Butler et al. 2016). The sum of these choices has significant impacts on the carbon  
71 storage potential of New England forests. Given that predicting the future of these socio-  
72 ecological systems is impossible, analyzing alternative land-use scenarios offers a robust way to  
73 plan for the future (McBride et al. 2017, 2019). Land-use scenarios describe potential future  
74 socio-ecological dynamics and their consequences, using internally consistent assumptions  
75 about major drivers of change (Li et al. 2008, Schulp et al. 2008, Sleeter et al. 2012, Popp et al.  
76 2014). Increasingly, scenarios are co-designed with stakeholders who, through a structured  
77 process, collectively envision possible future land-use pathways (Bradfield et al. 2005, McBride  
78 et al. 2017).

79 In this analysis we evaluate the consequences of five land-use scenarios for forest  
80 carbon in New England. One scenario represents a linear continuation of the recent trends in  
81 land use, including land-cover change and harvesting (Duveneck and Thompson 2019), and four  
82 divergent, alternative scenarios that were co-designed by more than 150 stakeholders (e.g.,  
83 conservationists, planners, resource managers, landowners, and scientists) as part of the New  
84 England Landscape Futures (NELF) project (Figure 1). The scenario co-design process was  
85 described in detail by McBride et al. (2017) and the process of translating the qualitative  
86 scenarios into simulations of land-cover change was described by Thompson et al. (2020). The  
87 described NELF alternative scenarios are highly divergent in terms of the types, intensities, and

88 spatial allocation of land use and, thus, represent a wide range of potential futures for the  
89 region's forests and the services they provide (Figure 2). The land-cover change simulations  
90 have subsequently been used to evaluate a range of future outcomes, including flood potential  
91 (Guswa et al. 2020), conservation priorities (*Losing Ground: Nature's Value in a Changing*  
92 *Climate, Sixth Edition of the Losing Ground series 2020, Thompson et al. 2020*), and wildlife  
93 habitat (Pearman-Gillman et al. 2020a, 2020b).  
94  
95

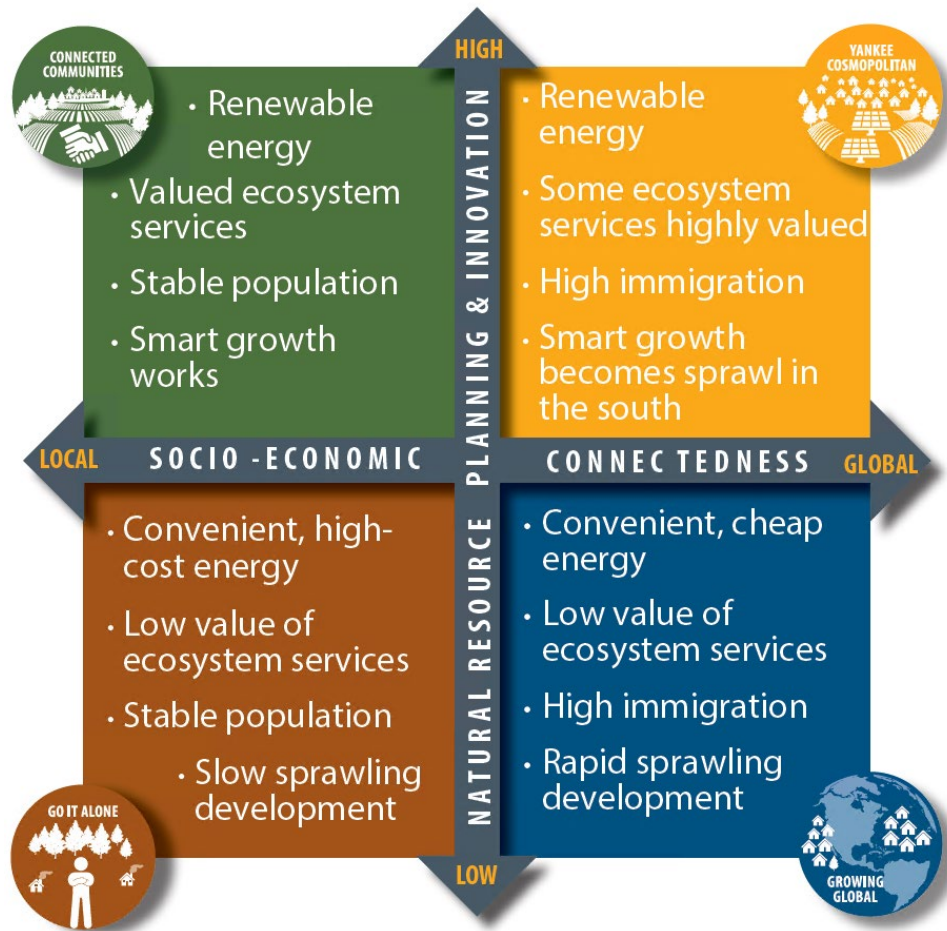

96  
97 Figure 1. New England Landscape Futures (NELF) scenarios. The four scenarios were articulated  
98 along two axes that were identified as the two drivers of greatest influence and uncertainty for  
99 future land-use change.  
100

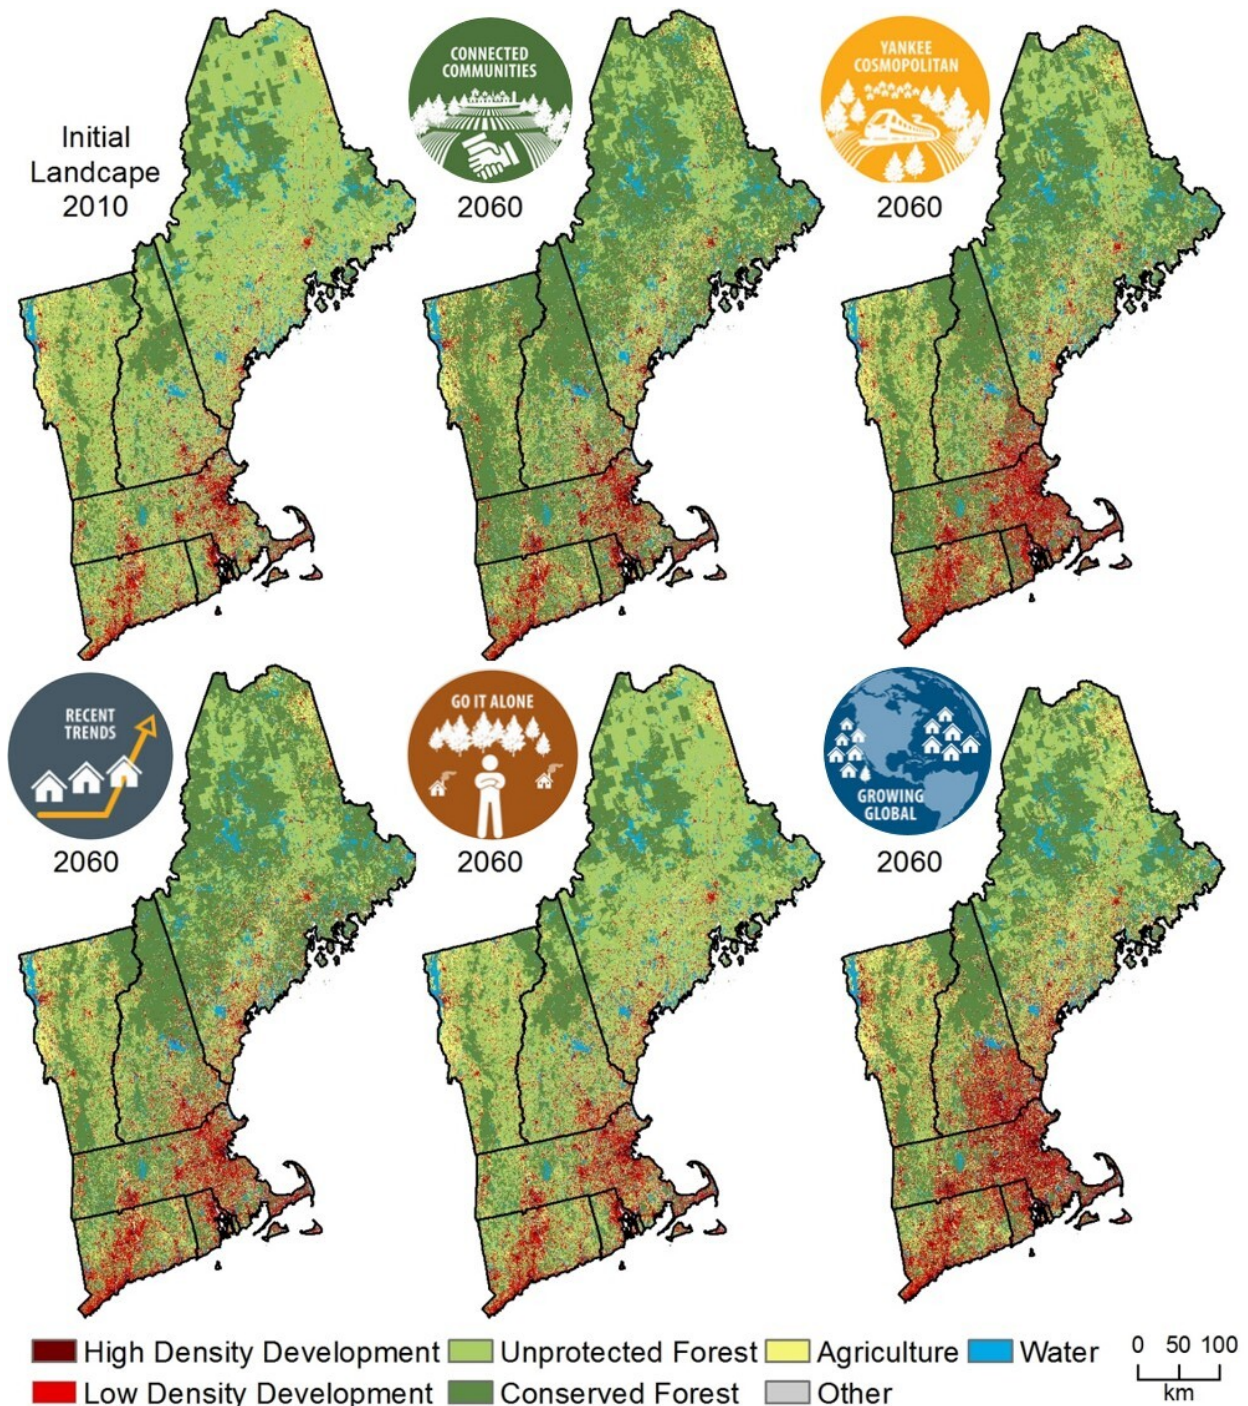

101  
102 Figure 2. The modeled land-cover change of recent trends in land-cover change as well as the  
103 four NELF stakeholder scenarios.  
104

105 Previously, we evaluated the impacts of a continuation of recent trends in harvesting  
106 and development on New England forests (Duveneck and Thompson 2019). This scenario  
107 assumed a continuation of the patterns of land use, including development and timber  
108 harvesting, observed over the last several decades. Recent trends in development patterns  
109 project an increase in development in the southern metropolitan areas as northern rural areas

110 become less populated (Thompson et al. 2020) (Figure 2). Under these assumptions, land use  
111 reduced carbon storage by 16% over fifty years, as compared to a counterfactual scenario with  
112 no land use (i.e., no development or harvesting). Ownership patterns, from small family forest  
113 owners to large industrial timberlands, explained a large part of the landscape variation in  
114 carbon dynamics (Duveneck and Thompson 2019), highlighting the importance of landowner  
115 impacts on carbon due to the disjointed management decisions of many private landowners. In  
116 contrast, climate change alone increased carbon stocks by only 8% in this recent trends  
117 scenario, due in large part to longer growing seasons (Duveneck et al. 2017).

118 Here we expand and improve our previous analysis to include the four co-designed  
119 scenarios and a more in-depth estimation of the changes in forest carbon due to future land  
120 use. These four co-designed scenarios present a range of future land-use regimes, in terms of  
121 development and harvesting, that impact future carbon storage and emissions, and therefore  
122 elucidate how changes in land-use can influence the total carbon balance of New England's  
123 forests. We also use an improved calibration and validation scheme to evaluate aboveground  
124 carbon accumulation, and we include a more complete accounting of the carbon dynamics that  
125 includes the removed aboveground carbon in all of our future land use scenarios (Smith et al.  
126 2006, Reinmann et al. 2016, Ma et al. 2020). Specifically, we ask: how do characteristics of the  
127 NELF scenarios' envisioned land-use regimes (i.e., harvest intensity and extent, forest loss to  
128 development, and wood product innovation) differentially drive changes in future aboveground  
129 carbon emissions, storage, and sequestration.

130

131

## 132 **METHODS**

### 133 **Study Area**

134 The study area is in the northeastern United States and encompasses the six New England  
135 states (Connecticut, Rhode Island, Massachusetts, Vermont, New Hampshire, and Maine)  
136 (Figure 3). The region contains approximately 13 million hectares of forest which cover  
137 approximately 80% of the land area. Forest types in the region span from oak pine forests in  
138 the south, to northern hardwoods across most of the central region, to boreal forests in the  
139 north (Duveneck et al. 2015). Likewise, mean annual temperatures span a north-south gradient  
140 from 3 to 10 °C. Mean annual precipitation in the region ranges from approximately 79 to 255  
141 cm, with higher rates of precipitation at higher elevation (Huntington et al. 2009). The New  
142 England region is inhabited by approximately 15 million people (2018 U.S. Census). Most of the  
143 people in New England are concentrated in the metropolitan areas of Southern New England  
144 (e.g., Boston, MA; Hartford, CT; and Providence, RI) with much of the rural north sparsely  
145 populated. The majority of forest land in the region is owned by private landowners with  
146 relatively small parcels (< 10 ha) who are largely uncoordinated in the management of their  
147 lands (Butler et al. 2016). Corporate and investment timber lands are concentrated in the  
148 north, primarily in Maine.

149

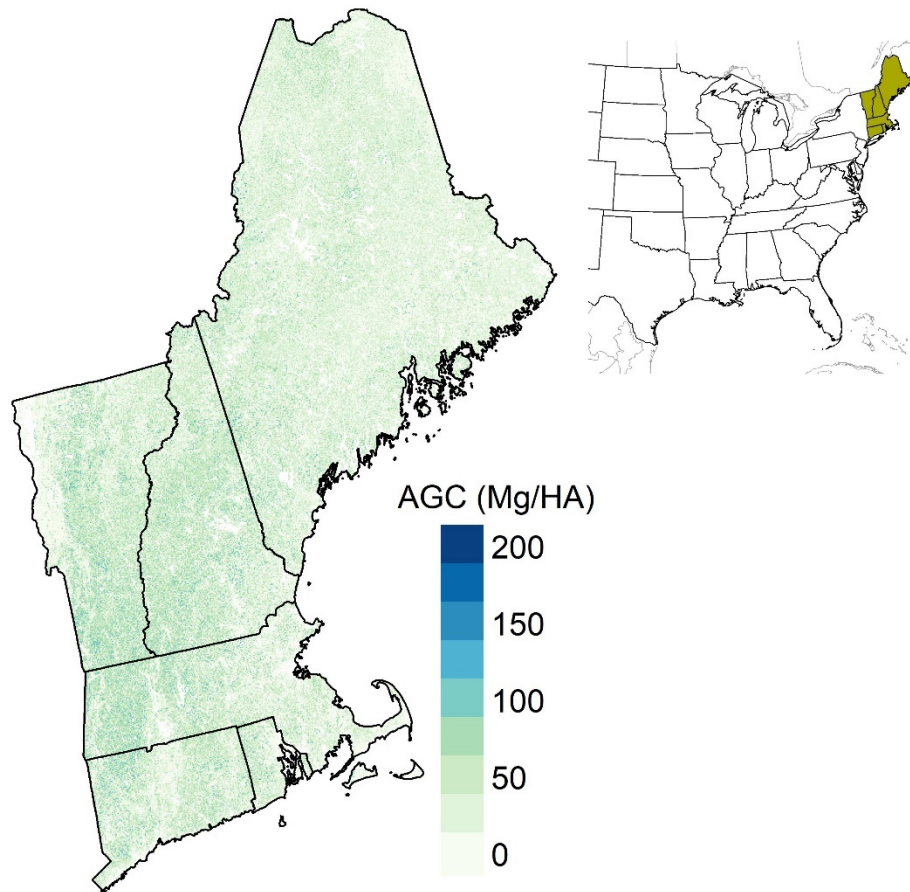

150  
151 Figure 3. New England study area map showing aboveground carbon (AGC; in Mg ha<sup>-1</sup>) for  
152 2010. Inset map shows study area within eastern United States.  
153

154

### 155 **Modeling framework**

156 We simulated the effects of the five divergent land-use scenarios as described by stakeholders  
157 as part of the NELF project (Thompson et al. 2020), on aboveground forest carbon in New  
158 England from 2010 to 2060. We used a forest composition raster with 250 m resolution from  
159 Duveneck et al. (2015) as our initial forest area, biomass, and composition for 2010 (Figure 3).  
160 This initial condition map was based on an imputation of USDA Forest Inventory and Analysis  
161 (FIA) plots (Bechtold and Patterson 2005). Belowground carbon, while quite important, was  
162 outside the scope of this research. To track aboveground carbon storage and emissions from  
163 land use (i.e., development and harvesting), we employed multiple models linked together to  
164 form our modeling framework. We first utilized the outputs from the NELF land-cover change  
165 simulations modeled using Dinamica – EGO, and described previously in Thompson et al.  
166 (2020), to spatially allocate forest land-cover transitions within each scenario (see Appendix I).  
167 Within the forested area, we simulated forest growth and succession using LANDIS-II  
168 (Mladenoff and He 1999, Scheller et al. 2007) with the PnET-Succession module (de Bruijn et al.  
169 2014) from 2010 to 2060 at 10-year time steps. We simulated timber harvesting using the

170 LANDIS-II extension Biomass-Harvest (Gustafson et al. 2000). We then coupled these models to  
171 a common carbon accounting framework to track the fate of carbon removed through various  
172 land-use practices (Smith et al. 2006). A more complete description of each model component  
173 is below.

174

#### 175 DEVELOPMENT AND CONSERVATION

176 As described previously in Thompson et al. (2017b, 2020), we used Dinamica – EGO v.2.4.1  
177 (Soares-Filho et al., 2002), a cellular land cover change model, to simulate land-cover  
178 transitions for each of the five land-use scenarios based on the individual scenario narratives  
179 and stakeholder input on how rates of land-cover change would be different in the co-designed  
180 scenarios from those observed in recent trends (Appendix I). Within the land-cover  
181 simulations, transition rates allocation parameters were defined individually for each core-  
182 based statistical area (CBSA) as defined by the U.S. Census ([www.census.gov](http://www.census.gov); accessed  
183 4/20/2019). For areas that did not fall within Census-defined CBSAs, new regions were defined  
184 to model land-cover transitions (Thompson et al. 2020). The modeled land covers included  
185 forest, agriculture, water, development, along with the transition of some forests to conserved  
186 forests (Figure 2). Land-cover transitions of interest to this project included transitions from  
187 forest to agriculture, low-density development, and high-density development, as well as from  
188 unconserved to conserved forest. For ease, we will refer to the conversion of forest to other  
189 land cover types (except water) generically as ‘development.’ Conservation became an  
190 important component of the land use simulations, as some of the simulated conserved forest  
191 restricted harvesting, and thus impacted the spatial allocation of harvest (see ‘Harvesting’  
192 below for more detail).

193 The resulting land cover maps from the Dinamica – EGO simulation had a 30 m spatial  
194 resolution and included individual maps of land cover for every 10<sup>th</sup> year of the 50-year  
195 simulations, from 2010 to 2050. The 30 m land cover simulation outputs were resampled to  
196 250 m to match the spatial resolution of our forest composition layer. During the resampling  
197 process, if there was only partial forest conversion of a single 250 m cell we calculated the  
198 proportion of the 250 m cell that was converted from forest to another land cover and removed  
199 the appropriate biomass from the 250 m cell to represent the proportional area converted to  
200 other land cover. We did not simulate afforestation in these scenarios (i.e., agriculture  
201 transitioning to forest) as these patterns are not prevalent in this landscape and were not  
202 included in the narratives of the future scenarios.

203

#### 204 FOREST GROWTH AND MODELING CALIBRATION

205 For all forested areas in New England, we simulated forest growth using the PnET-Succession  
206 extension (v.3.4) (de Bruijn et al. 2014) of the LANDIS-II (v. 7.0) forest simulation model  
207 (Scheller et al. 2007). LANDIS-II is a spatially explicit, mechanistic forest landscape model that  
208 simulates forest growth, competition, and dispersion within forest raster cells. Rather than  
209 model individual trees, LANDIS-II simulates species-age cohorts which mature and disperse  
210 within interacting cells. PnET-Succession simulates photosynthesis, respiration, and mortality  
211 based on the PnET Carbon Model (Aber et al. 1995) and has been extensively evaluated and  
212 utilized in New England (e.g., Duveneck and Thompson 2017, 2019, Liang et al. 2018, McKenzie  
213 et al. 2019) and beyond. One of the strengths of the combination of LANDIS-II and PnET-

214 Succession is that it is a mechanistic model based on first principals of forest growth, and  
215 therefore useful in simulating the impacts of changes in land use in novel circumstances, such  
216 as with climate change (Gustafson 2013, Duveneck and Thompson 2019). Therefore, we used  
217 the Regional Conservation Pathway (RCP) 8.5 emission scenario (Stocker et al. 2013) as  
218 projected by the Hadley Global Environment v.2-Earth System Global Circulation Model (GCM),  
219 downscaled and obtained from the USGS Geo Data Portal (Stoner et al. 2013) to evaluate the  
220 impacts of land use, with climate change, for all scenarios. For each NELF scenario simulation,  
221 we used LANDIS-II/PnET-Succession to model growth and senescence of aboveground tree  
222 biomass, and therefore track carbon stocks and fluxes, for forested areas at 10-year time steps.

223 To account for carbon loss to natural disturbance, we simulated a low-frequency wind  
224 disturbance regime across all scenarios, because this is the primary background natural  
225 disturbance occurring across the region. We used the Base Wind extension (Mladenoff and He  
226 1999) for LANDIS-II to emulate these low-severity wind-based mortality events. Specifically, we  
227 simulated a wind rotation period of 400 years with a maximum, mean, and minimum patch size  
228 of 400, 20, and 6 hectares, respectively. Within each wind patch, the probability of cohort  
229 mortality was based on the cohort age, where cohorts that had reached 85% of their age had a  
230 mortality probability of 0.65. Younger cohorts had successively lower mortality probabilities.

231 To evaluate our PnET-Succession parameterization of growth and carbon accumulation  
232 on undisturbed sites, we compared the mean county-level annual forest growth from  
233 remeasured FIA subplots (Bechtold and Patterson 2005) with simulated forest growth in each  
234 county. Specifically, we aggregated tree biomass from FIA subplots that were > 90% forested,  
235 and had at least 2 measurements after the year 2000. In addition, we further selected only the  
236 plots that were relatively undisturbed (i.e., plots that had not experienced an identified  
237 disturbance, nor increased biomass in the remeasurement period). To calculate observed  
238 forest growth at the county level, we first summed the live aboveground tree biomass for each  
239 FIA subplot for each remeasurement period. Next, we converted these values to carbon  
240 (carbon = 0.5 \* biomass) and annualized the carbon accumulation using the number of years  
241 between remeasurement periods unique to that plot. We then divided each subplot's carbon  
242 accrual by its forested area (i.e., the area of the subplot multiplied by the percent of the subplot  
243 that was forested) to produce annualized changes in carbon density ( $\text{Mg ha}^{-1} \text{ yr}^{-1}$ ). Finally, for  
244 counties with greater than 10 such FIA plots, we aggregated subplots within each county and  
245 calculated mean and standard deviation of carbon density.

246 To compare these FIA estimates of forest growth with our LANDIS-II simulations of  
247 forest growth, we simulated forest growth across New England, from 2010 to 2020, with no  
248 impacts from human development or harvest, using our imputed 2010 forest biomass map for  
249 our initial forest conditions. This 10-year evaluation time period approximated two FIA  
250 remeasurement periods (most FIA plots are revisited in approximately 5-year intervals). We  
251 included the wind disturbance regime described above in our simulation of forest growth, since  
252 similar light disturbances were also included in the FIA plot data. We then calculated the mean  
253 annual change in simulated aboveground carbon accumulation for each New England  
254 county. For each county, we compared the annual carbon accumulation observed within FIA  
255 plots to those simulated by LANDIS-II. Most simulated and observed county mean carbon  
256 accumulation rates were within 25% of each other, and all LANDIS-II means were within one  
257 standard deviation of the FIA means (Figure 4). Additionally, the grand means were not



258 significantly different ( $p < 0.05$ ) and differed by less than 1% (FIA 1.451 Mg ha<sup>-1</sup> yr<sup>-1</sup>, LANDIS-II  
 259 1.455 Mg ha<sup>-1</sup> yr<sup>-1</sup>). Given the variability of tree growth both in observed tree growth and in the  
 260 simulations due to the stochastic processes within LANDIS-II, we were satisfied by the overall  
 261 level of agreement between the simulated and observed growth in FIA plot data.

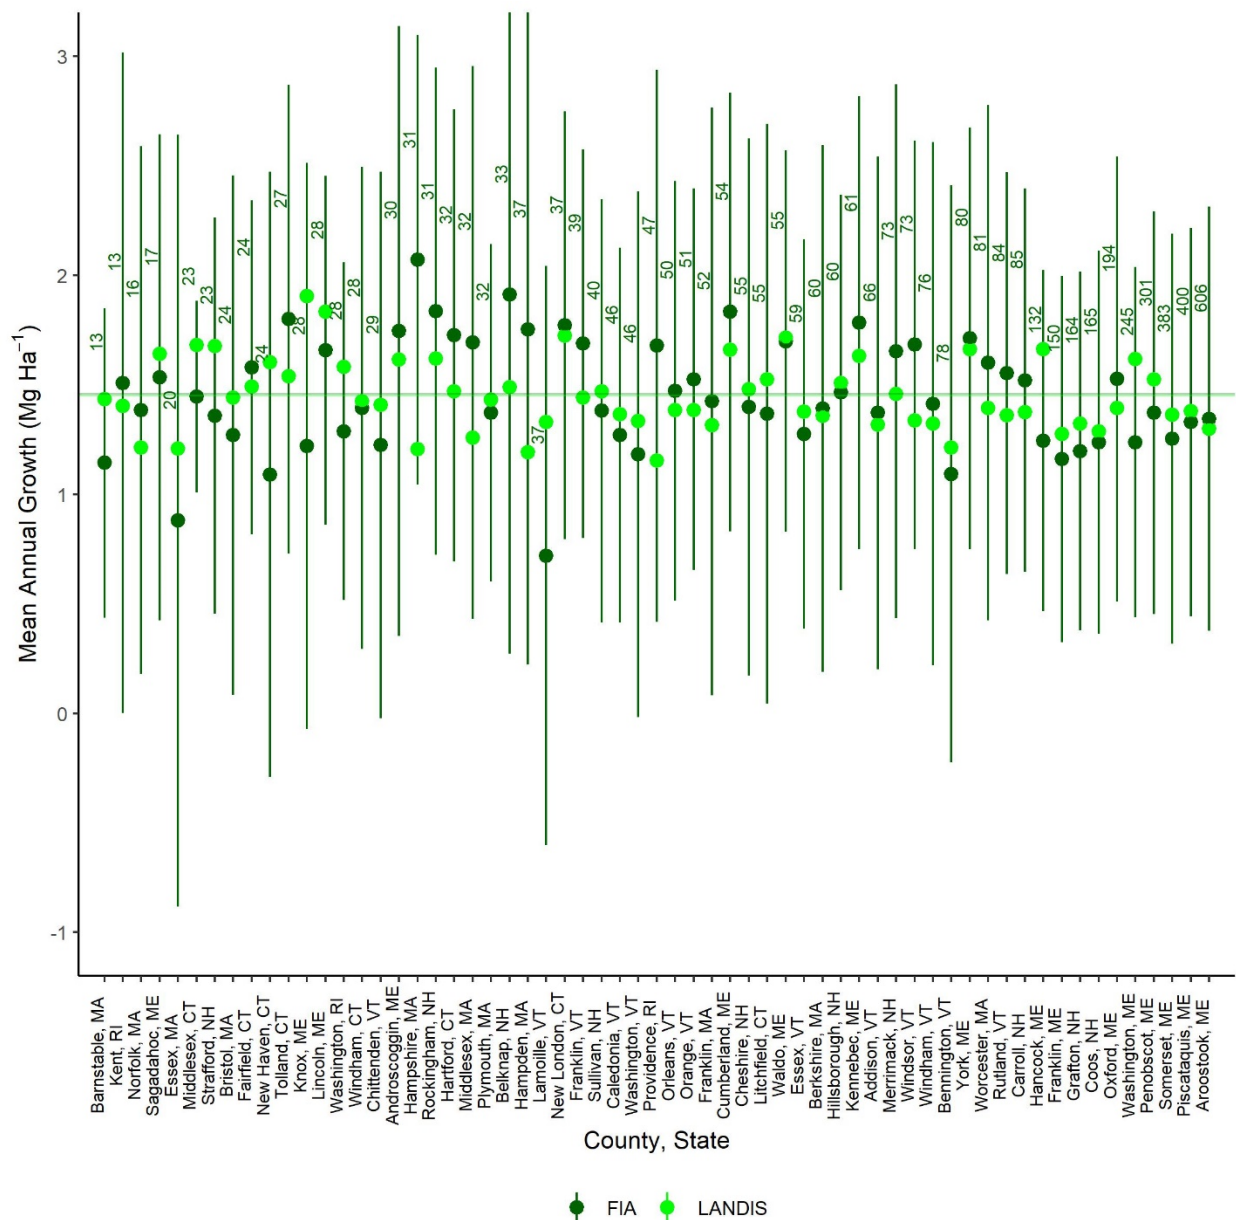

262  
 263 Figure 4. Observed carbon growth (dark green; FIA) and simulated carbon growth (light green;  
 264 LANDIS-II) within New England counties with greater than 10 FIA plots. Dots and lines represent  
 265 means and standard deviation, respectively, for the FIA data. Horizontal lines represent the  
 266 grand means of both observed and simulated growth across counties, however they are  
 267 insignificantly different ( $p < 0.05$ ) and too close to be distinguishable.

268  
 269  
 270 HARVESTING

271 We used the LANDIS-II Biomass Harvest extension (v. 4.2) (Gustafson et al. 2000) at 10-year  
272 time steps to simulate timber harvest. We leveraged previous work by Duveneck and  
273 Thompson (2019) to define our harvesting prescriptions and initialize our allocation of those  
274 prescriptions for the Recent Trends (RT) scenario (Appendix II). For each alternative scenario,  
275 we adjusted the RT harvesting prescriptions and rates based on the stakeholder designed NELF  
276 scenario storylines (see below and Appendix II for specifics).

277 Several improvements to our modeling framework resulted in differences between our  
278 previous simulations of recent trends (Duveneck and Thompson 2019) and those presented  
279 here. Improvements include an updated version of PnET-Succession that does not initialize  
280 cohorts by growing each individual species-cohort. Rather, we used a recently developed  
281 function that gave each cohort a predetermined initial biomass based on the imputation of FIA  
282 plots into individual forest cells (from Duveneck et al. 2015). Specifying the initial biomass of  
283 each species-cohort reduced the uncertainty of our starting conditions and provided a  
284 consistent and better approximation of forest conditions at the beginning of each simulation.  
285 While updating our initial conditions to include initial biomass, we also simplified our initial  
286 communities and updated species-specific parameters. Compared to the results presented in  
287 Duveneck and Thompson (2019), these updates resulted in 9% more overall biomass in 2060  
288 and only slight differences in relative species abundances.

289 We also improved our approach to simulating regional variation in management and the  
290 impacts of conservation on spatial harvesting patterns. To simulate regionally-specific harvest  
291 behaviors, we delineated 'Management Areas' as specific ownership groups and conservation  
292 statuses within New England states (Duveneck and Thompson 2019). Initially management  
293 regions were designated at the state level, but due to significant differences in both current  
294 harvest characteristics and changes described in the NELF scenario narratives, we split New  
295 Hampshire and Vermont into north and south regions to allow sub-state regional variation in  
296 harvest rates (see Appendix III).

297 To incorporate conservation in our modeling of harvest, we prohibited harvest in areas  
298 designated as conserved with USGS Gap Analysis Program (GAP) Status Codes 1 and 2, which  
299 represent conserved lands with management restricted to conservation purposes only (i.e., no  
300 commercial harvesting). We allowed harvest to occur on all other conserved lands, which is  
301 consistent with most multiple-use conservation restrictions. As areas changed within each  
302 scenario simulation from not conserved/restricted to conserved with GAP Status Codes 1 & 2,  
303 harvesting was reallocated from these newly conserved areas to forests that were not  
304 conserved with harvesting restrictions. We did this by defining a new set of management areas  
305 based on management region (i.e., state or substate area) and time step of conversion to  
306 conserved forest. During the time steps prior to conservation, the harvest rates and allocations  
307 for the conserved forest management areas were the same as those in the unconserved forests  
308 in that management region; then, at the time step of conservation, harvest rates were set to  
309 zero for the conserved forest management area and the rates of harvest were proportionally  
310 increased, based on area, for the unconserved parts of the management region (outside of the  
311 conserved forest management area). In this way, target harvesting rates were still met for each  
312 timestep of the simulation, but harvesting did not occur within areas projected to be conserved  
313 with GAP Status Codes 1 & 2. Thus, the effects of conservation did not have large effects on  
314 harvest rates at the landscape scale, as those rates remained true to the scenario storylines, but

315 the spatial allocation of those harvests did change.

316

### 317 **Allocating harvest prescriptions for recent trends**

318 To estimate the area to harvest in each management area, we used remeasured FIA plot data  
319 grouped by region and ownership type. Similar to the methods we used to parameterize forest  
320 growth and those in Thompson et al. (2017a), we used FIA plots with two or more  
321 measurements after 2000 to calculate the proportion of FIA plots harvested in each  
322 management area. The proportion of plots harvested of all available plots in a management  
323 area was then divided by the remeasurement period to estimate the annual harvest rate for  
324 each management area (See Appendix III). A plot was considered “harvested” if at least one  
325 tree was marked as removed within the FIA tree-level database between remeasurement  
326 periods. Therefore, we considered harvest in the broadest sense, including both commercial  
327 and incidental harvest (*sec.* Belair and Ducey 2018) in this analysis of harvesting. Similarly, to  
328 estimate average harvest intensity (i.e., percent biomass removed in a harvest), we joined FIA  
329 plot and individual tree data to calculate total carbon (C) for each plot and total and percent C  
330 removed through harvest between remeasurement periods. We then averaged the percent C  
331 removed in each management area to calculate the target average intensity of harvest for  
332 applying harvest prescriptions (Appendix III). Average harvest intensities were relatively low,  
333 since all types of tree removal were considered “harvests” for this analysis.

334 Within each management area, harvest prescriptions were implemented based on  
335 modified RT harvesting prescriptions from Duveneck & Thompson (2019) (Appendix II) and  
336 harvest proportions in Belair and Ducey (2018) (Appendix III). A single time-step test simulation  
337 of our model with the defined harvest prescriptions allowed us to compute the average harvest  
338 intensity (i.e., percent carbon removed) for each of the prescriptions. For these RT  
339 prescriptions, we then used a linear programming with maximum likelihood estimation method  
340 to determine the best allocation of harvest prescriptions within each management area so that  
341 the overall intensity of harvest in our simulations approximated the average harvest intensity  
342 from FIA for that management area (See Appendix III for more details).

343

### 344 **Carbon allocation**

345 The fate of carbon removed from the landscape through harvesting was tracked using a  
346 common method for carbon accounting that was developed by the U.S. Forest Service for  
347 greenhouse gas accounting (Smith et al. 2006). We then adapted these carbon accounting  
348 methods to fit with our integrated modeling of aboveground carbon dynamics. While the Smith  
349 et al. (2006) carbon accounting methods were based on relatively older timber product output  
350 reports and mill efficiencies etc., the methods were both standard and flexible enough that we  
351 were able to modify these methods to use with the cohort modeling approach of LANDIS-II and  
352 PnET-Succession.

353 The Smith et al. (2006) carbon accounting methods track carbon from growing stock  
354 trees into several carbon pools (e.g., slash, landfill, firewood, and wood products) according to  
355 forest type and species-specific decay or transfer rates (Figure 5). These methods use individual  
356 tree measures (e.g., diameter, merchantability) to define growing stock, measures that are not  
357 simulated in LANDIS-II and PnET-Succession. Therefore, we modified the approach to  
358 accommodate the tree cohort outputs from LANDIS-II and cohorts 20 years old or older were

359 considered potential growing stock. We used the Biomass Community Output extension in  
 360 LANDIS-II (Scheller 2020) to evaluate cohort ages at the time of removal. For removed cohorts  
 361 less than 20 years old (i.e. not potential growing stock and not tracked in the Smith et al. (2006)  
 362 methods), 14% of the total carbon was allocated to the slash pool to account for material left  
 363 on site to decay (following Reinmann et al. 2016), and the remaining 86% of the harvested  
 364 carbon was allocated to the fuelwood category and was mineralized (emitted) by the next time  
 365 step (Figure 5). Then, for all removed cohorts over 20 years old (potential growing stock), the  
 366 same 14% was allocated to the slash pool to account for material left on site to decay, including  
 367 trees that were not merchantable, with the remaining 86% of the removed cohorts considered  
 368 'growing stock', as used in Smith et al. (2006). The removed growing stock's C was then  
 369 allocated to different carbon pools at each time step using the modified Smith et al., (2006)  
 370 accounting methods (illustrated in Figure 5, and in more detail in Appendix IV), with transfer  
 371 and decay rates based on the forest type and wood type of the removed cohorts (Appendix IV).  
 372 The harvested carbon allocation to different pools and decomposition rates were unaltered  
 373 from the Smith et al., (2006) accounting methods for our RT scenario.  
 374

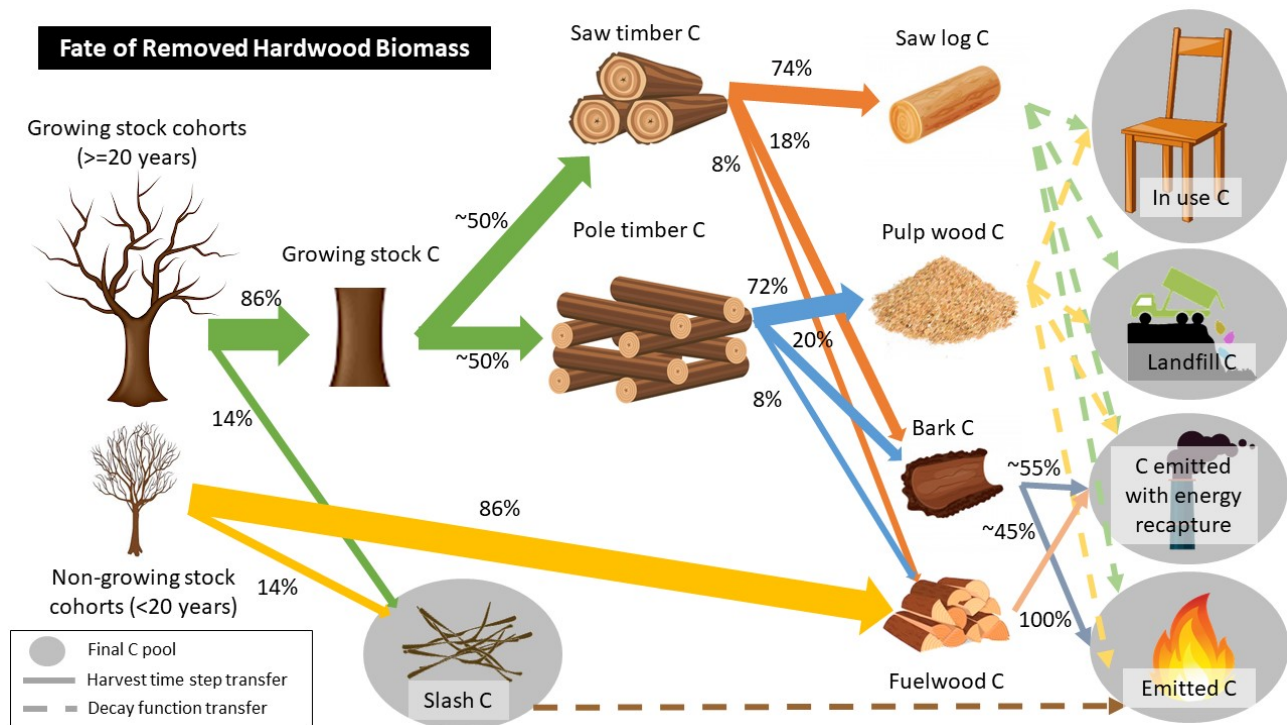

375 Figure 5. Example allocation of carbon into final carbon pools for hardwood species in the RT  
 376 scenario. Proportions change for softwood species and by scenario. Dashed lines represent  
 377 between-pool transitions, with allocation proportions dependent on time since removal,  
 378 whereas solid arrows indicate transitions that are constant and occur at the time of removal.  
 379  
 380

381 Following a similar analysis by Reinmann et al., (2016), the carbon removed from  
 382 development in RT was assumed to not enter the timber market. Instead, half of the carbon  
 383 removed through development was allocated to fuelwood and mineralized (emitted) in that  
 384 time step, and the other half of the removed carbon was added to the slash pool and was

385 emitted using a softwood/hardwood specific decomposition rate (Russell et al. 2014). Note,  
386 our accounting framework only tracked carbon from harvesting or development during our  
387 simulation time-frame, from 2010-2060, so any carbon removed prior to 2010, or any  
388 transitions (e.g., from “in-use” to “emitted”) that happened after 2060, were not tracked.  
389

### 390 **Translation of the scenarios into harvesting prescriptions and carbon allocation**

391 Using the same methods as those used to translate qualitative stakeholder scenario  
392 descriptions of land cover change into quantitative inputs for our land-cover change model  
393 (Thompson et al. 2020), we translated the four NELF scenario narratives from qualitative  
394 descriptions of resource use and harvest patterns into differential rates of harvest intensity,  
395 area harvested, and carbon allocation (Appendices II and III). Each of the alternative scenarios  
396 had additional harvest prescriptions that were defined and directly linked to the scenario  
397 narratives and changes to harvesting rates were defined relative to Recent Trends (RT)  
398 (Appendix II). Some of the scenario narratives also indicated innovative approaches to  
399 development/timber use or energy generation, resulting in differential allocation of carbon into  
400 either in-use pools or emitted with energy recapture. For example, in Connected Communities  
401 (CC), stakeholders indicated a need to use biomass energy as a transition fuel to more  
402 renewable sources; this statement translated to the creation of a biomass harvest prescription  
403 where all biomass (minus that allocated to slash) was emitted with energy recapture.  
404

## 405 **RESULTS**

### 406 **Combined carbon consequences of land-use changes**

407 Despite widely divergent land-use regimes, New England’s forests remained a net carbon sink  
408 to 2060—i.e., more carbon was sequestered in forests and stored in wood products than was  
409 released to the atmosphere—in four of the five future scenarios, including Recent Trends (RT)  
410 (Table 3, Figure 6). Only in the Go it Alone (GA) scenario did New England’s forests become a  
411 net carbon source, with total emissions of 68 Tg C, by the year 2060. Additionally, the amount  
412 of carbon stored in live biomass (i.e., sequestered) through 2060, was greater than the  
413 emissions from forestry and development in three of the five scenarios: RT, Connected  
414 Communities (CC), and Yankee Cosmopolitan (YC) (Figure 6). Only after accounting for the  
415 carbon stored in wood products, landfill, and slash did the Growing Global (GG) scenario  
416 become a net carbon sink over the 50 years, since carbon emissions in this scenario were  
417 greater than the carbon sequestered. In YC and CC, the lower amount of harvested carbon  
418 resulted in increased sequestration rates and reduced emissions as compared to RT. Increased  
419 harvesting in GA and GG resulted in nearly equal amounts of carbon stored and emitted. Below  
420 we describe in more detail the differences of contributions to each of the storage and emissions  
421 pools: live, stored, and development and forestry emissions.  
422

423 Table 3. Total carbon emissions and storage for each scenario (storage includes the sequestered  
424 live aboveground forest carbon and any harvested carbon stored in wood, slash and landfills in  
425 2060).

| <b>Scenario</b>            | <b>Total emitted (Tg C)</b> | <b>Total stored (Tg C)</b> | <b>Total carbon balance (Tg C)</b> |
|----------------------------|-----------------------------|----------------------------|------------------------------------|
| Recent Trends (RT)         | 360                         | -672                       | -312                               |
| Connected Communities (CC) | 227                         | -787                       | -560                               |
| Go it Alone (GA)           | 574                         | -506                       | 68                                 |
| Growing Global (GG)        | 482                         | -526                       | -44                                |
| Yankee Cosmopolitan (YC)   | 112                         | -844                       | -732                               |

426

427

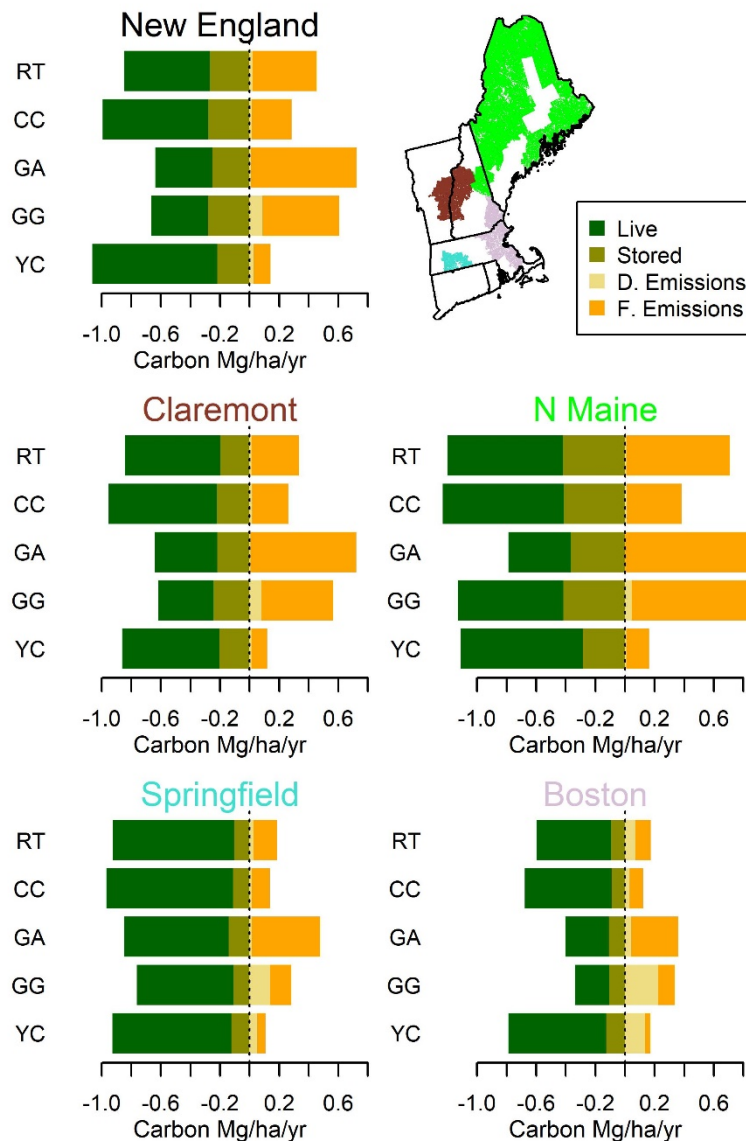

428  
 429 Figure 6. Rates of emission and storage for removed carbon and live carbon for all of New  
 430 England, and within four example CBSAs: Claremont (in NH and VT), N Maine, Springfield in  
 431 central MA, and Boston (which covers the seacoast in most of MA and NH). The colors of each  
 432 CBSA name above each chart correspond to CBSA areas on inset map. “Live” represents the  
 433 total carbon sequestration or accumulation of live biomass; “Stored” is the rate of storage of  
 434 carbon in slash, wood products, and landfills; “D. Emissions” are the development emissions;  
 435 and “F. Emissions” are the emissions from forestry for the full 50-year simulation.  
 436

### 437 Forest carbon stocks

438 Forest growth in New England was the primary contributor to carbon storage in all scenarios,  
 439 though there were regional/CBSA variations by scenario (Figures 6 & 7). These regional  
 440 differences in live carbon stocks were not only driven by changes in land-use drivers, but also by  
 441 climate, with warming enhancing growth more in the south than the north (Figures 6 & 7). In

442 both CC and YC, forests accumulated more aboveground carbon (AGC) than in RT, generally  
443 from a combination of reduced timber harvesting and forest conversion (Figure 7). However,  
444 the increased harvesting and development reduced the ability of the forest to store carbon in  
445 both the GG and GA scenarios (Figure 7). The narratives of each of the scenarios also altered  
446 the spatial allocation of land use and therefore carbon. In the two global socio-economic  
447 connectedness scenarios, YC and GG, the impacts of harvesting and conversion are very similar,  
448 yielding higher losses of aboveground carbon nearer to currently highly developed areas (e.g.  
449 Boston, MA) and therefore less carbon accumulation/sequestration (Figure 7). Conversely,  
450 timber harvesting was a main driver of aboveground carbon removal in CC and GA, which  
451 resulted in less AGC accumulation in the less densely developed parts of New England (e.g., N  
452 Maine).

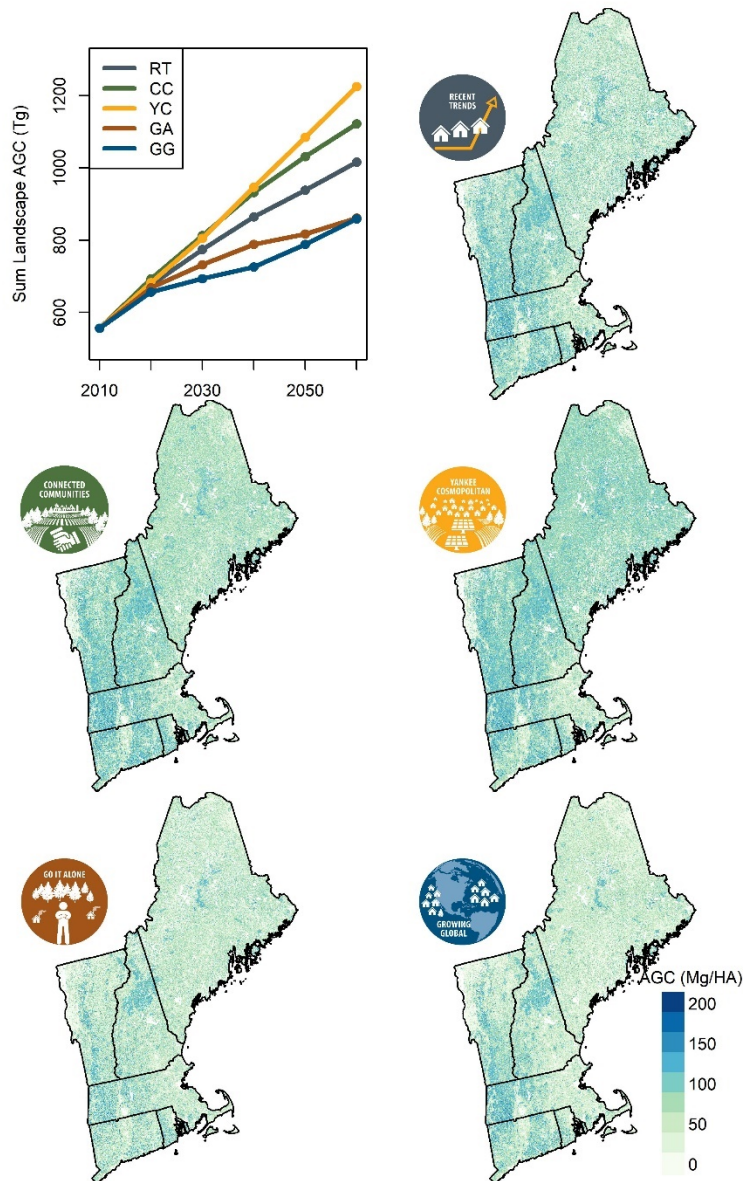

453



454 Figure 7. Maps of AGC ( $\text{Mg ha}^{-1}$ ) for each scenario at 2060. For comparison, Figure 3 shows AGC  
455 at year 2010 starting conditions. Line graph shows sum of AGC (Tg) accumulation for each  
456 scenario over time.

457

#### 458 **Harvesting and development rates**

459 Carbon emissions and storage varied spatially based upon the differences in development and  
460 harvesting for each of the scenarios by region/CBSA (Figure 6 & 8). For example, Boston had  
461 relatively higher development emissions in scenarios with global socio-economic  
462 connectedness (i.e., YC and GG) (Figure 6). In contrast, emissions from harvesting were higher  
463 in rural regions like Northern Maine for scenarios with local socio-economic connectedness  
464 (i.e., GA and CC) (Figure 6). Similar to previous studies (e.g., Canham et al. 2013, Thompson et  
465 al. 2017a, Duveneck and Thompson 2019), more C is removed through timber harvesting than  
466 through conversion of forests to development in all of the scenarios. Indeed, in the RT  
467 scenario presented here, 12x more carbon was removed by harvesting than by development  
468 (Figure 8). Importantly, three of the four stakeholder-articulated scenarios predicted an  
469 increase in harvested area, but the intensity and spatial allocation of harvesting were distinct in  
470 each scenario (Appendix III).

471 Given the increase in the target harvested area outlined in all but the YC scenario, some  
472 of the management areas did not have enough forested area that met harvest criteria  
473 remaining in 2060 to sustain harvest rates. Therefore, some scenarios deviated in total area  
474 harvested from the harvest area targets. Specifically, as shown in Figure 8, the GG scenario did  
475 not have enough suitable stands available to meet the target harvest area beginning in 2040.  
476 However, although the GA scenario had similar harvest area targets, our models were able to  
477 continue to harvest at nearly the target rates throughout the simulation by allowing more  
478 harvest to occur in southern New England, whereas GG limited harvesting to the northern  
479 reaches of NE (Figure 8). The resulting total harvested area after 50 years for GG was 143% of  
480 RT and the area harvested in GA was 144% of RT. Similarly, CC harvested 129% of the total area  
481 harvested in RT. Only the YC scenario resulted in less area harvested, approximately 79% of the  
482 area harvested in the 50-year RT simulation (Figure 9a).

483

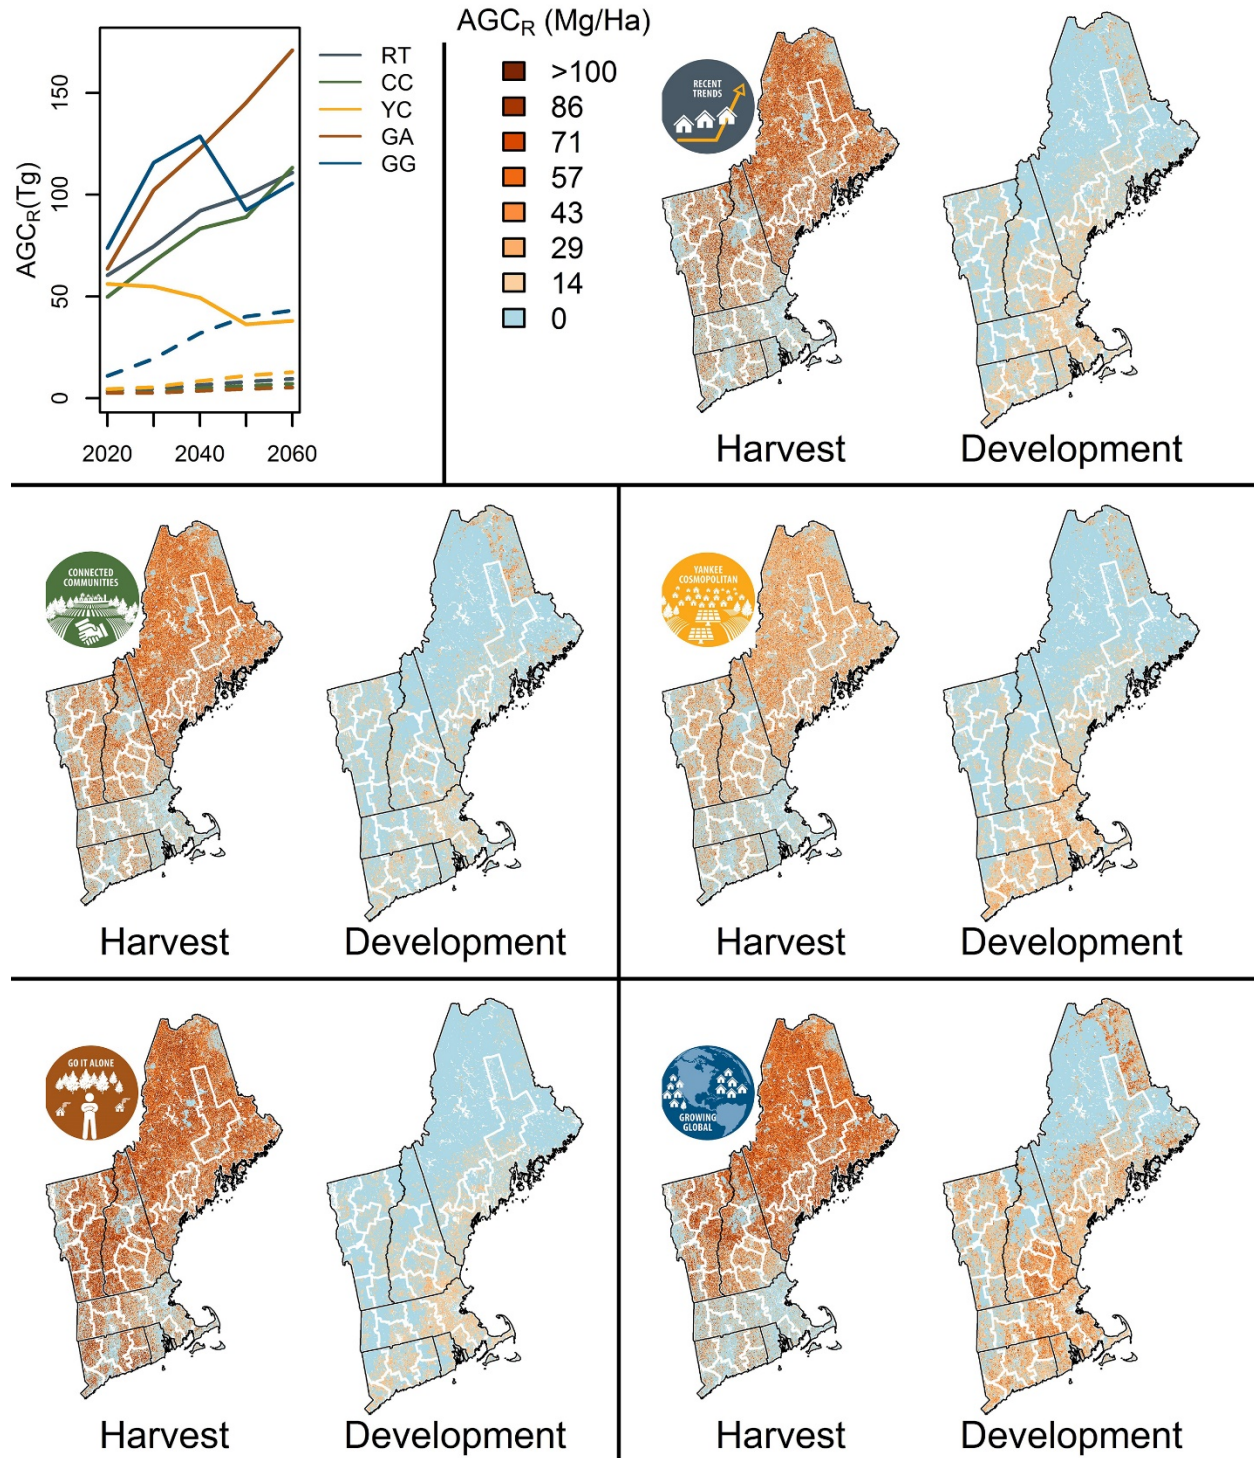

484  
 485 Figure 8. Line chart shows total aboveground carbon removed ( $AGC_R$ ) over time for each  
 486 scenario. Harvest removals are solid lines. Developed removals are dashed lines. Maps of total  
 487 removed aboveground carbon by either harvest or development for each scenario with CBSAs  
 488 outlined in white and state boundaries outlined in black.

489

490 Total carbon removed by harvest varied by scenario and the intensity of the alternative

491 harvest prescriptions defined in the scenario narratives. New scenario-specific prescriptions  
 492 (i.e., not used in RT) were generally less intense than those in RT (Table 4) and often emulated  
 493 attributes of silvicultural practices that promote diversity and potentially longer-term carbon  
 494 storage (e.g., longer rotation periods, promoting/retaining a diversity of age, size, and species).  
 495 As a result of these new prescriptions, both of the high natural resource planning and  
 496 innovation scenarios, CC and YC, removed less overall carbon from the landscape than RT (CC  
 497 removed 78% of RT, and YC removed 46% of RT), despite CC harvesting more area (Figure 9).  
 498 GG and GA both removed more C in the form of harvested timber than RT (110% and 139% of  
 499 RT, respectively), and the difference between these two scenarios was primarily driven by  
 500 differences in the intensities of the applied harvest prescriptions (Figure 9, Table 4).  
 501

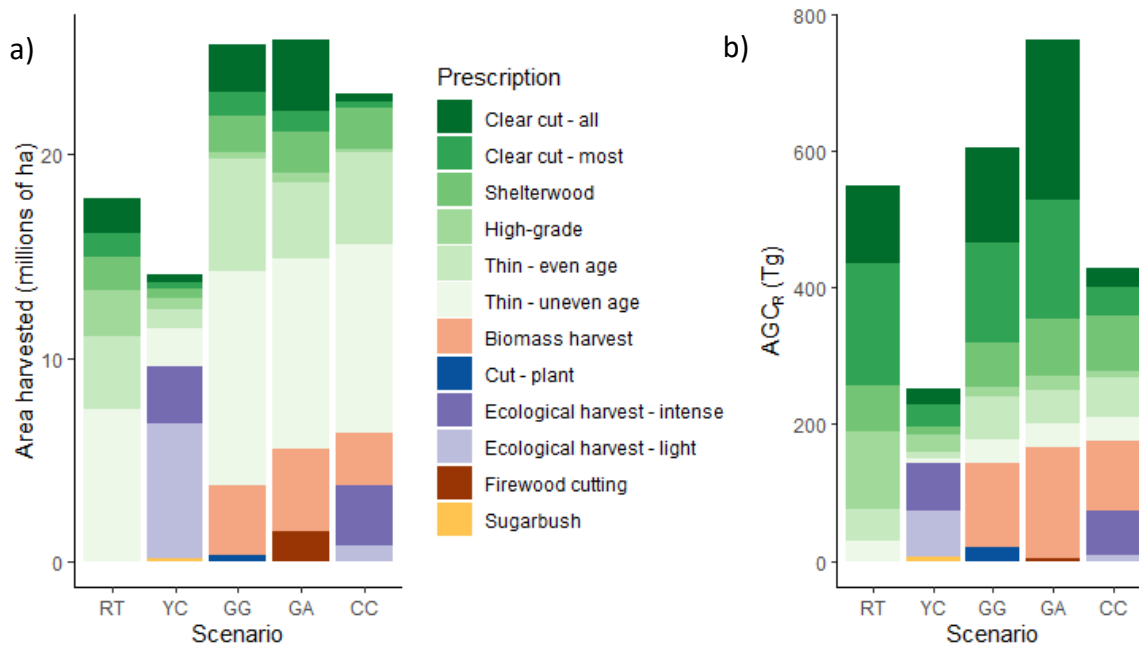

502 Figure 9. a) Cumulative area harvested by prescription for each scenario. b) Cumulative  
 503 aboveground carbon removed by harvest prescription for each scenario. Prescriptions shown in  
 504 green are the original Recent Trend prescriptions, while the other prescriptions are those  
 505 created and defined from the alternative scenario narratives.  
 506

507  
 508 Table 4. Changes in area and intensity of development and harvesting by scenario. Harvest  
 509 intensity includes all types of tree removal – commercial and incidental (non-commercial).  
 510 Development intensity reflects an assumption that forested sites converted to agriculture, high-  
 511 density development, and low-density development will reduce forest biomass by 100%, 94%,  
 512 and 50%, respectively.  
 513

| Scenario                   | Total Area Developed/Converted (K ha) <sup>1</sup> | Average Development Intensity (% AGC <sub>R</sub> ) | Total Harvest Area (K ha) | Average Harvest Intensity (% AGC <sub>R</sub> ) |
|----------------------------|----------------------------------------------------|-----------------------------------------------------|---------------------------|-------------------------------------------------|
| Recent Trends (RT)         | 567                                                | 60%                                                 | 17853                     | 35%                                             |
| Connected Communities (CC) | 325                                                | 82%                                                 | 23036                     | 25%                                             |
| Go it Alone (GA)           | 375                                                | 53%                                                 | 25645                     | 36%                                             |
| Growing Global (GG)        | 2199                                               | 71%                                                 | 25450                     | 32%                                             |
| Yankee Cosmopolitan (YC)   | 170                                                | 58%                                                 | 14119                     | 25%                                             |

514

515 **Harvesting and development emissions and storage**

516 In the RT scenario, approximately two-thirds of the removed carbon, from either harvesting or  
517 development, was emitted by 2060, totaling 360 Tg C (Figure 10). One-third, or 212 Tg C was  
518 stored in use, landfilled, or as slash. The fate of removed carbon for the alternative NELF  
519 scenarios differed based on how the narratives described carbon emissions and storage  
520 deviated from RT. For example, in scenarios with high natural resource planning and  
521 innovation (i.e., CC and YC), the narratives described increased use of wood products and  
522 decreased landfilling of wood products, keeping a higher proportion of the removed carbon in  
523 storage by the year 2060 than in other scenarios (Figure 10). These scenarios also had fewer  
524 total carbon emissions than RT and a more balanced allocation of carbon into emitted vs.  
525 stored pools, with YC having the lowest overall emissions at 112 Tg C and approximately 61%  
526 (174 Tg C) of the removed carbon remaining in stored pools at the end of the simulation. CC  
527 had nearly equal proportions of carbon emitted and stored in 2060, with emissions of 227 Tg C  
528 and 221 Tg C stored. Both of the scenarios with lower natural resource planning and innovation  
529 had much higher emissions, both as a proportion of total carbon allocation and total carbon  
530 emitted. Sixty-eight percent of the carbon removed in GG was emitted by 2060, totaling 482 Tg  
531 C (with 223 Tg C stored), and 74% of the carbon removed in GA was emitted, totaling 574 Tg C  
532 (with 201 Tg C stored) (Figure 10).

533

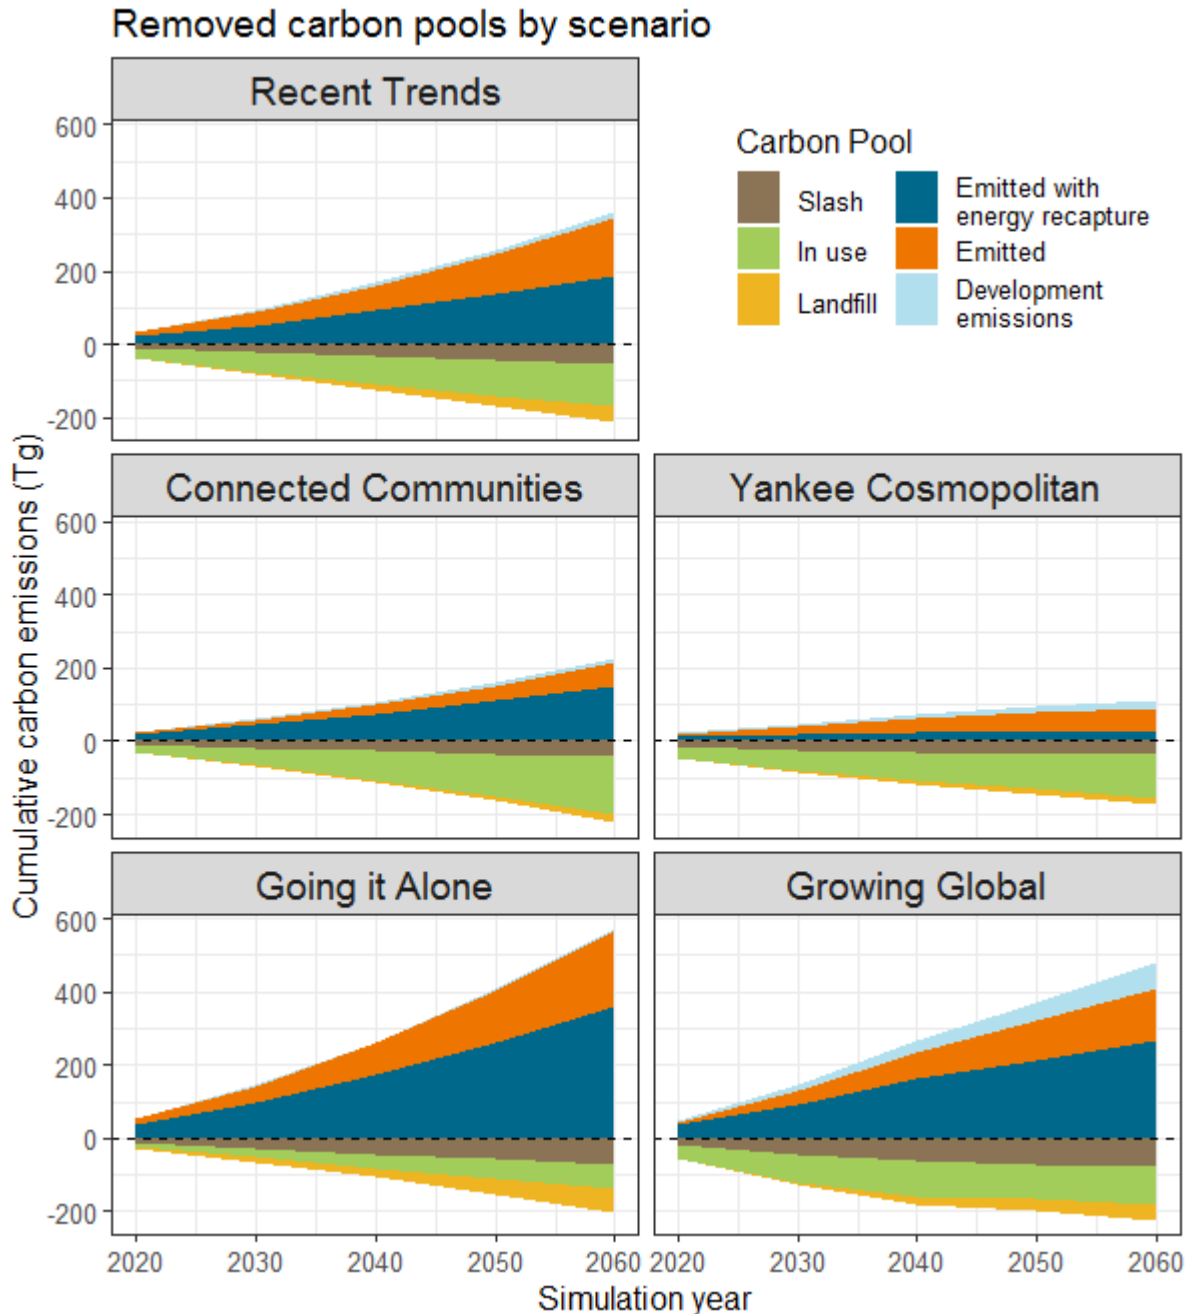

534  
535 Figure 10. Cumulative total carbon emissions and storage from removed carbon for each  
536 scenario throughout the simulation. Additional breakdown of emissions by removal type is in  
537 Appendix IV.

538  
539

## 540 DISCUSSION

541 In forests around the world, land-use decisions will influence whether a landscape will act as a  
542 net carbon sink or source. Indeed, the land-use decisions in each of our scenario narratives  
543 drove whether New England forests remained a net carbon sink or source in our 50-year

544 simulations. In some scenarios, like Yankee Cosmopolitan (YC), the recovery dynamics of the  
545 relatively young New England forests and increased growth due to climate change allowed  
546 forests to remain a strong carbon sink. However, in others, such as Go it Alone (GA), the  
547 individual management choices of private forest landowners produced carbon emissions that  
548 surpassed the ability of New England forests to sequester carbon, and New England forests  
549 became a net carbon source by 2060. The impact of the individual scenarios on carbon  
550 dynamics was most closely tied to changes in “natural resource planning and innovation” within  
551 each of the narratives. Along this axis of change, stakeholders described changes to harvest  
552 intensity, area harvested, as well as how much of the harvested timber went into long-term  
553 storage as compared to the Recent Trends (RT) scenario. These changes in timber production  
554 and use substantially altered the carbon balance of New England in 2060.

555 In the RT scenario, there was an additional 312 Tg C stored in 2060, as compared to  
556 2010, the start of the scenarios, primarily stored as live biomass within forests. Forest growth in  
557 the RT scenario, enhanced by climate change, resulted in an increase in carbon stocks by 670 Tg  
558 C as compared to starting conditions. Of the removed carbon in RT, approximately two-thirds  
559 of it was emitted into the atmosphere by 2060, with 95% of these emissions from harvesting  
560 (both commercial and incidental). These emissions are equivalent to 1,320 MMtCO<sub>2</sub>eq over the  
561 50-year simulation. Our estimates of carbon impacts of land use in the RT simulation are  
562 comparable to other studies of carbon change. For example, Harris et al. (2016) estimated that  
563 New England as a whole stored 16.1 Tg C yr<sup>-1</sup>, emitted 9.0 Tg C yr<sup>-1</sup>; for a net carbon change of -  
564 7.1 Tg C yr<sup>-1</sup> (negative indicating stored) between 2006 and 2010. In our projection of recent  
565 trends, New England stored around 13.4 Tg C yr<sup>-1</sup> and emitted 7.2 Tg C yr<sup>-1</sup>, for a net carbon  
566 change of -6.2 Tg C yr<sup>-1</sup>. Like in Harris et al. (2016), the vast majority of our projected carbon  
567 losses (i.e., emissions) were from harvesting, but the continuation of New England forests’  
568 recovery from mid 19<sup>th</sup> century deforestation and increased growth due to climate change  
569 (Duveneck et al. 2017) resulted in a net increase in carbon stocks. Therefore, projected  
570 changes in harvesting for each of the stakeholder defined NELF scenarios had the largest  
571 impacts on carbon stocks and fluxes through 2060.

572 When designing the scenarios, the stakeholders tried to envision changes to harvesting  
573 practices and wood product utilization that diverged quite a bit from those in RT and each  
574 other. For example, in the Connected Communities (CC) scenario, stakeholders created a  
575 narrative that described a transition to ‘ecological forestry’, but an increase in overall harvested  
576 area. Therefore, despite harvesting nearly 30% more area compared to RT, the transition to  
577 ‘ecological forestry’ resulted in a 10% reduction in average harvest intensity, and therefore 125  
578 Tg C less removed from the landscape. The narrative of CC also focused on innovative uses and  
579 valuing of local timber products as part of “natural resource innovation.” These new local  
580 timber products assumed new technologies like cross-laminated timber products for building  
581 materials (New England Forestry Foundation 2017, Kaboli et al. 2020), resulting in more of the  
582 removed carbon remaining in “in use” products by the end of the simulation. For this scenario  
583 (i.e., CC), the combination of the increase in timber that remained in durable goods and the  
584 reduction in overall harvest intensity resulted in 133 Tg less carbon emitted than in RT and 115  
585 Tg more carbon stored in the same time period. The combined carbon benefit of these choices  
586 resulted in approximately 909 MMtCO<sub>2</sub>eq fewer emissions through reduced direct emissions  
587 and increased sequestration. Importantly, of the carbon emitted, there was only 34 Tg C less

588 emitted with energy recapture than in RT, indicating that CC could continue to meet most of  
589 the projected wood energy demands of New England as in RT. Similarly, 43 Tg more stored  
590 carbon remained in use at the end of the simulation, meaning projected wood product demand  
591 could also be met at similar levels as RT.

592 Correspondingly, an overall reduction in harvesting, in both area and intensity, has an  
593 even more pronounced impact on carbon emissions and storage, as seen in the Yankee  
594 Cosmopolitan (YC) scenario. Since the YC narrative emphasized global connectedness, fewer  
595 natural resources needed to be sourced in New England than in CC or RT, allowing total  
596 harvesting to reduce dramatically in this scenario. Along with the reduction in timber  
597 harvesting, the YC scenario described landfilling less long-term wood products, which resulted  
598 in more carbon remaining in storage throughout the simulation. These land-use choices (i.e.,  
599 YC scenario) resulted in the largest decrease in emissions, 248 Tg C less than RT, and the largest  
600 increase in C stocks, 172 Tg C more than in RT, primarily through increased forest growth. This  
601 had a combined carbon benefit of approximately 1,540 MMtCO<sub>2</sub>eq fewer emissions (and  
602 increased sequestration) as compared to RT.

603 However, land-use decisions such as those described in these NELF scenarios also have  
604 carbon consequences which were not represented in our simulations (e.g., issues of  
605 substitution or leakage). The carbon impacts of sourcing products, such as building materials,  
606 and changes to energy demand/production to meet the increasing population in YC were  
607 outside the scope of this analysis and yet have major carbon emissions implications. For  
608 example, in the YC scenario an additional 3 Tg C is “in use” at the end of the scenario, as  
609 compared to RT, but the housing demand is likely to be much higher in YC. Therefore, it is likely  
610 that these building materials would need to be sourced from other parts of the world, causing  
611 leakage not addressed in this paper (Henders and Ostwald 2012). Additionally, nearly 165 Tg C  
612 less was emitted with energy recapture in YC, meaning without meaningful energy efficiency  
613 measures, energy would need to be produced through other means, such as renewable sources  
614 (as described in the YC narrative), that would also have land use and carbon implications.

615 Conversely, stakeholders also described two scenarios that resulted in higher carbon  
616 emissions from land use than RT (GG and GA), and one where New England Forests became a  
617 net carbon source by 2060 (i.e., GA). The Go it Alone (GA) narrative described a future land-use  
618 scenario where New Englanders met local demand for wood products through increased local  
619 harvest, increasing total area and harvest intensity, and relied more heavily on biomass energy  
620 (as opposed to acquiring electricity or heat from distant power-plants). These two changes to  
621 land use and energy generation resulted in a scenario that emitted 68 Tg more carbon than it  
622 sequestered and stored over the 50-year simulation. As compared to RT, GA emitted 214 Tg  
623 more carbon, especially in the emissions with energy recapture pool (e.g., biomass energy), and  
624 stored 166 Tg C less, with a combined net increase in emissions of approximately 1,393  
625 MMtCO<sub>2</sub>eq. While these land-use choices resulted in a scenario where forests were unable to  
626 sequester carbon at a rate greater than the emissions from harvesting, the 358 Tg C emitted  
627 with energy recapture in GA may offset some emissions from other energy sources, such as  
628 fossil fuels, though the benefit from replacement of these fuel types was outside the scope of  
629 this study.

630 Similarly, Growing Global (GG) also expanded total harvest area to meet higher demand  
631 for wood products due to a quickly increasing human population (as described in the GG

632 narrative). The combination of the increase in harvesting and development in GG resulted in  
633 122 Tg C more emissions than RT and 146 Tg C less storage, contributing a net increase in  
634 emissions of 983 MMtCO<sub>2</sub>eq over the 50-year simulation, as compared to RT. Despite GG  
635 having the largest expansion of developed area of any scenario, increasing the total  
636 development 288% over RT, harvesting was still responsible for over 85% of the total carbon  
637 emissions. Despite the overwhelming contribution of harvesting to emissions, development  
638 negatively impacted sequestration. Indeed, simulated harvest generally resulted in slightly  
639 increased rates of sequestration in the 50 years of our study (though lowered stocks), while  
640 development resulted in both the reduction of stocks and no sequestration at that site. As  
641 visualized in Figure 6, development in GG caused rates of sequestration to be similar in GG and  
642 GA, despite significantly more tree removal in GA.

643 The GG scenario described a rapid expansion of total harvested area and a larger  
644 proportion of the simulated harvested timber remaining “in use”, or stored, as building  
645 materials due to the rapidly expanding development. However, we found that the forested  
646 area in GG was not able to sustain the high levels of harvesting needed to meet the increased  
647 demand in our 50-year simulations. These results extend what other recent studies have  
648 found, which is that current levels of timber harvesting are creating degraded and poorly  
649 stocked forests in New England, particularly in the northern-most areas where harvesting rates  
650 are highest (e.g., Gunn et al. 2019). Since most of the harvesting for GG was targeted for the  
651 more rural, northern areas of New England, the already degraded forests could not meet the  
652 demand for building lumber. Therefore, the simulated total harvested area was approximately  
653 the same as in GA, with slightly lower average intensity harvests. The timber harvesting  
654 described in the original GG scenario was therefore not sustainable, and also could lead to  
655 further carbon emissions due to the need to meet these demands using non-timber products or  
656 imported lumber.

657 Changes to timber harvesting and use, as well as development, had individual and  
658 interactive impacts on total carbon storage and emissions in New England. However,  
659 harvesting had the most immediate and profound effects on total emissions and the ability of  
660 the forests to sequester and store carbon. Interestingly, it was the combination of stakeholder  
661 described changes in both harvest area and intensity that drove changes to total carbon  
662 removed. The two extractive scenarios, GA and GG, described rapidly expanding harvest areas  
663 at current intensity levels and resulted in higher emissions and lower sequestration than RT.  
664 However, YC and CC described a decrease in overall harvest intensity, but CC was matched with  
665 an increase in total harvested area. These two scenarios (i.e., YC and CC) with less intense  
666 harvests sequestered more carbon than the other scenarios, including RT.

667 While overall harvesting drove most of the changes in simulated carbon sequestration  
668 and storage, the uses of the cut timber altered the proportion of the removed carbon  
669 remaining in stored pools at the end of each scenario. For example, in the RT scenario, by the  
670 end of the 50-year simulation, approximately 66% of the wood was emitted, but in the CC  
671 scenario, which focused on using wood in innovative long-term durable goods (e.g., cross-  
672 laminated timber), only approximately 50% of the harvested carbon was emitted by 2060.  
673 These scenarios show the importance of both decreasing harvest intensities and increasing  
674 long-term wood product storage as two measures for increasing carbon storage and  
675 sequestration and reducing land use carbon emissions. For the most immediate impacts on



676 climate change and reduction of atmospheric CO<sub>2</sub>, land-use decisions that reduce total carbon  
677 removed from the landscape (e.g., reductions in harvesting) have the largest potential to  
678 reduce emissions and increase storage. However, for these short-term gains in forest carbon to  
679 be true gains, these land-use decisions must be paired with reductions in the consumption of  
680 wood products and their replacements that would otherwise lead to leakage and substitution  
681 emissions of equal or greater impact.

682

### 683 *Limitations and future directions*

684 These scenarios and simulations present the carbon implications for land-use decisions  
685 that may occur by 2060. However, these decisions will impact carbon storage for years beyond  
686 the end of our simulations. For example, while the impacts of development on carbon for each  
687 of our scenarios was limited, the permanent conversion of land from forest to development has  
688 long-term impacts on sequestration that would not be borne out in the timeframe of these  
689 scenarios (Sleeter et al. 2018). We expect that over longer timeframes, the impact of  
690 development in these scenarios would become more pronounced. Additionally, we did not  
691 explicitly quantify the forgone sequestration from development, or the carbon accumulation  
692 that would have occurred if the development had not. Our simulations do quantify the direct  
693 impacts of harvesting and development on sequestration through their cumulative impacts on  
694 final carbon balance, but we did not quantify the indirect impacts of land use on the carbon  
695 potential of the landscape. We expect that including forgone sequestration would increase  
696 indirect carbon emissions from development, though the magnitude of this impact should be  
697 explored in further research. Similarly, our simulations do not account for emissions from  
698 sources that were created prior to 2010. For example, slash from harvests prior to 2010 were  
699 not a source of carbon emissions in our carbon accounting framework. Finally, we acknowledge  
700 that belowground carbon is an incredibly important aspect to carbon accounting, encompassing  
701 approximately half, or more, of the landscape carbon, with its own complex spatial patterns  
702 (Woodall et al. 2015, Jevon et al. 2019, Finzi et al. 2020). These spatial complexities can also  
703 emphasize the differential impacts of development and timber harvesting, but given this  
704 complexity and our modeling framework, we felt addressing the potential shifts in belowground  
705 carbon were beyond the scope of this paper.

706 Another limitation is that the carbon accounting framework used for the Recent Trends  
707 scenario is based on timber product reports, markets, and technologies that were available  
708 nationwide in the early 2000s (Smith et al. 2006). We expect that due to changes and  
709 improvements in timber production, these methods may now slightly underestimate the total  
710 amount of timber that is “in use” at the end of the simulation and overestimate the total  
711 emissions. While the magnitude of the effect of the timber production improvements is  
712 unknown, other carbon accounting methods give similar results (Harris et al. 2016), indicating  
713 that the overall effect on our carbon accounting is likely small and the relative changes of  
714 emissions and storage in the scenarios are still pertinent.

715 We also did not directly try to model changes to emissions and storage in each scenario  
716 using specific technology (e.g., housing changes, cross-laminated timber, smaller saw-kerf),  
717 since it is difficult to predict what technologies will be most relevant or may exist in 2060.  
718 Instead, we tried to account for these changes by implementing relative changes to what  
719 stayed in long-term wood products in our carbon accounting framework. In addition, we did

720 not explicitly account for carbon leakage and substitution (i.e., the carbon emissions from  
721 products that would need to be garnered from new sources or locations given a reduction in  
722 the availability of timber), although these would impact overall carbon emissions for each of  
723 the scenarios. Finally, we did not address the myriad of other benefits forests have in the  
724 region, many of which have been explored in other papers using these scenarios (e.g.,  
725 Thompson et al. 2020, Pearman-Gillman et al. 2020a, 2020b, Guswa et al. 2020), instead  
726 limiting our focus to the direct carbon impacts of land use. We hope that these scenarios will  
727 continue to be used to explore the impacts of future land-use decisions on other ecosystem  
728 services.

729 This work highlights how even seemingly small land-use decisions can have major  
730 impacts on the ability of the forests to mitigate climate change. For example, the 10%  
731 reduction in harvest intensity, coupled with the increase in long-term storage of wood products  
732 in the Connected Communities scenario resulted in emissions reductions that are equivalent to  
733 taking all of the passenger cars in New England off the road for nearly 30 years (FHWA 2015).  
734 Importantly, much of the reduction in harvest intensity in the Connected Communities scenario  
735 was implemented in northern New England. Here, parcels are larger, forest ownership is more  
736 focused on timber, and forests have more potential for additional carbon sequestration  
737 through enhanced silvicultural strategies (Thompson et al. 2017a, Gunn et al. 2019, Cook-  
738 Patton et al. 2020b). Additionally, by engaging in thoughtful regional planning to avoid rapid  
739 expansion of development like that simulated in Growing Global, we can also keep forests as  
740 forests and ensure these lands continue to sequester carbon into the future. As we work to  
741 promote resilient forests that can help mitigate the impacts of climate change, this research  
742 supports keeping as much of the land forested as possible, implementing sustainable harvest  
743 practices that maximize diversity and carbon storage through well planned management, and  
744 investing in technologies that encourage longer-term storage of wood products.

745

#### 746 **ACKNOWLEDGEMENTS**

747 We would sincerely like to thank Kathy Fallon Lambert who was integral in the design of the  
748 New England Landscape Futures project and scenarios. We would also like to thank Dr. Eric  
749 Gustafson for his insightful comments on a draft of this manuscript. This research was  
750 supported in part by National Science Foundation funded to the Harvard Forest Long Term  
751 Ecological Research Program (Grant No. NSF-DEB 12-37491) and the Scenarios Society and  
752 Solutions Research Coordination Network (Grant No. NSF-DEB-13-38809).

753

#### 754 **CITATIONS**

755 Aber, J. D., S. V. Ollinger, C. A. Federer, P. B. Reich, M. L. Goulden, D. W. Kicklighter, J. M.  
756 Melillo, and R. G. Lathrop. 1995. Predicting the effects of climate change on water yield  
757 and forest production in the northeastern United States. *Climate Research* 5:207–222.  
758 Bechtold, W. A., and P. L. Patterson. 2005. The Enhanced Forest Inventory and Analysis  
759 Program-National Sampling Design and Estimation Procedures. U.S. Department of  
760 Agriculture, Forest Service, Southern Research Station, Asheville, NC.  
761 Belair, E. P., and M. J. Ducey. 2018. Patterns in Forest Harvesting in New England and New York:  
762 Using FIA Data to Evaluate Silvicultural Outcomes. *Journal of Forestry* 116:273–282.  
763 Bradfield, R., G. Wright, G. Burt, G. Cairns, and K. Van Der Heijden. 2005. The origins and

- 764 evolution of scenario techniques in long range business planning.
- 765 de Bruijn, A., E. J. Gustafson, B. R. Sturtevant, J. R. Foster, B. R. Miranda, N. I. Lichti, and D. F.
- 766 Jacobs. 2014. Toward more robust projections of forest landscape dynamics under novel
- 767 environmental conditions: Embedding PnET within LANDIS-II. *Ecological Modelling* 287:44–
- 768 57.
- 769 Butler, B. J., S. J. Crocker, G. M. Domke, C. M. Kurtz, T. W. Lister, P. D. Miles, R. S. Morin, R. J.
- 770 Piva, R. Riemann, and C. W. Woodall. 2015. The forests of Southern New England, 2012.
- 771 Butler, B. J., J. H. Hewes, B. J. Dickinson, K. Andrejczyk, S. M. Butler, and M. Markowski-Lindsay.
- 772 2016. Family Forest Ownerships of the United States, 2013: Findings from the USDA Forest
- 773 Service’s National Woodland Owner Survey. *Journal of Forestry* 114:638–647.
- 774 Canham, C. D., N. Rogers, and T. Buchholz. 2013. Regional variation in forest harvest regimes in
- 775 the northeastern United States. *Ecological Applications* 23:515–522.
- 776 Cook-Patton, S. C., S. M. Leavitt, D. Gibbs, N. L. Harris, K. Lister, K. J. Anderson-Teixeira, R. D.
- 777 Briggs, R. L. Chazdon, T. W. Crowther, P. W. Ellis, H. P. Griscom, V. Herrmann, K. D. Holl, R.
- 778 A. Houghton, C. Larrosa, G. Lomax, R. Lucas, P. Madsen, Y. Malhi, A. Paquette, J. D. Parker,
- 779 K. Paul, D. Routh, S. Roxburgh, S. Saatchi, J. van den Hoogen, W. S. Walker, C. E. Wheeler,
- 780 S. A. Wood, L. Xu, and B. W. Griscom. 2020a. Mapping carbon accumulation potential from
- 781 global natural forest regrowth. *Nature* 585:545–550.
- 782 Cook-Patton, S. C., S. M. Leavitt, D. Gibbs, N. L. Harris, K. Lister, K. J. Anderson-Teixeira, R. D.
- 783 Briggs, R. L. Chazdon, T. W. Crowther, P. W. Ellis, H. P. Griscom, V. Herrmann, K. D. Holl, R.
- 784 A. Houghton, C. Larrosa, G. Lomax, R. Lucas, P. Madsen, Y. Malhi, A. Paquette, J. D. Parker,
- 785 K. Paul, D. Routh, S. Roxburgh, S. Saatchi, J. van den Hoogen, W. S. Walker, C. E. Wheeler,
- 786 S. A. Wood, L. Xu, and B. W. Griscom. 2020b. Mapping carbon accumulation potential from
- 787 global natural forest regrowth. *Nature* 585:545–550.
- 788 Duveneck, M. J., and J. R. Thompson. 2017. Climate change imposes phenological trade-offs on
- 789 forest net primary productivity. *Journal of Geophysical Research: Biogeosciences*
- 790 122:2298–2313.
- 791 Duveneck, M. J., and J. R. Thompson. 2019. Social and biophysical determinants of future forest
- 792 conditions in New England: Effects of a modern land-use regime. *Global Environmental*
- 793 *Change* 55:115–129.
- 794 Duveneck, M. J., J. R. Thompson, E. J. Gustafson, Y. Liang, and A. M. G. de Bruijn. 2017.
- 795 Recovery dynamics and climate change effects to future New England forests. *Landscape*
- 796 *Ecology* 32:1385–1397.
- 797 Duveneck, M. J., J. R. Thompson, and B. T. Wilson. 2015. An imputed forest composition map
- 798 for New England screened by species range boundaries. *Forest Ecology and Management*
- 799 347:107–115.
- 800 FHWA. 2015. Office of Highway Policy Information - Policy | Federal Highway Administration.
- 801 <https://www.fhwa.dot.gov/policyinformation/statistics/2010/mv1.cfm>.
- 802 Finzi, A. C., M. Giasson, A. A. Barker Plotkin, J. D. Aber, E. R. Boose, E. A. Davidson, M. C. Dietze,
- 803 A. M. Ellison, S. D. Frey, E. Goldman, T. F. Keenan, J. M. Melillo, J. W. Munger, K. J.
- 804 Nadelhoffer, S. V. Ollinger, D. A. Orwig, N. Pederson, A. D. Richardson, K. Savage, J. Tang, J.
- 805 R. Thompson, C. A. Williams, S. C. Wofsy, Z. Zhou, and D. R. Foster. 2020. Carbon budget of
- 806 the Harvard Forest Long-Term Ecological Research site: pattern, process, and response to
- 807 global change. *Ecological Monographs*:ecm.1423.

- 808 Gunn, J. S., M. J. Ducey, and E. Belair. 2019. Evaluating degradation in a North American  
809 temperate forest. *Forest Ecology and Management* 432:415–426.
- 810 Gustafson, E. J. 2013. When relationships estimated in the past cannot be used to predict the  
811 future: using mechanistic models to predict landscape ecological dynamics in a changing  
812 world. *Landscape Ecology* 28:1429–1437.
- 813 Gustafson, E. J., S. R. Shifley, D. J. Mladenoff, K. K. Nimerfro, and H. S. He. 2000. Spatial  
814 simulation of forest succession and timber harvesting using LANDIS. *Canadian Journal of  
815 Forest Research* 30:32–43.
- 816 Guswa, A. J., B. Hall, C. Cheng, and J. R. Thompson. 2020. Co-designed Land-use Scenarios and  
817 their Implications for Storm Runoff and Streamflow in New England. *Environmental  
818 Management*:1–16.
- 819 Harris, N. L., S. C. Hagen, S. S. Saatchi, T. R. H. Pearson, C. W. Woodall, G. M. Domke, B. H.  
820 Braswell, B. F. Walters, S. Brown, W. Salas, A. Fore, and Y. Yu. 2016. Attribution of net  
821 carbon change by disturbance type across forest lands of the conterminous United States.  
822 *Carbon Balance Manage* 11:24.
- 823 Henders, S., and M. Ostwald. 2012. Forest Carbon Leakage Quantification Methods and Their  
824 Suitability for Assessing Leakage in REDD. *Forests* 3:33–58.
- 825 Houghton, R. A., J. I. House, J. Pongratz, G. R. Van Der Werf, R. S. Defries, M. C. Hansen, C. Le  
826 Quéré, and N. Ramankutty. 2012. Carbon emissions from land use and land-cover change.  
827 *Biogeosciences* 9:5125–5142.
- 828 Huntington, T. G., A. D. Richardson, K. J. McGuire, and K. Hayhoe. 2009. Climate and  
829 hydrological changes in the northeastern United States: Recent trends and implications for  
830 forested and aquatic ecosystems. *Canadian Journal of Forest Research* 39:199–212.
- 831 Jevon, F. V., A. W. D’Amato, C. W. Woodall, K. Evans, M. P. Ayres, and J. H. Matthes. 2019. Tree  
832 basal area and conifer abundance predict soil carbon stocks and concentrations in an  
833 actively managed forest of northern New Hampshire, USA. *Forest Ecology and  
834 Management* 451:117534.
- 835 Kaboli, H., P. L. Clouston, and S. Lawrence. 2020. Feasibility of Two Northeastern Species in  
836 Three-Layer ANSI-Approved Cross-Laminated Timber. *Journal of Materials in Civil  
837 Engineering* 32:04020006.
- 838 Kittredge, D. B., J. R. Thompson, L. L. Morreale, A. G. Short Gianotti, and L. R. Hutyrá. 2017.  
839 Three decades of forest harvesting along a suburban-rural continuum. *Ecosphere*  
840 8d:e01882.
- 841 Li, H., Y. Ma, T. M. Aide, and W. Liu. 2008. Past, present and future land-use in Xishuangbanna,  
842 China and the implications for carbon dynamics. *Forest Ecology and Management* 255:16–  
843 24.
- 844 Liang, Y., M. J. Duveneck, E. J. Gustafson, J. M. Serra-Diaz, and J. R. Thompson. 2018. How  
845 disturbance, competition, and dispersal interact to prevent tree range boundaries from  
846 keeping pace with climate change. *Global Change Biology* 24:e335–e351.
- 847 *Losing Ground: Nature’s Value in a Changing Climate*, Sixth Edition of the *Losing Ground* series.  
848 2020. .
- 849 Ma, W., G. M. Domke, C. W. Woodall, and A. W. D’Amato. 2020. Contemporary forest carbon  
850 dynamics in the northern U.S. associated with land cover changes. *Ecological Indicators*  
851 110:105901.

- 852 McBride, M. F., M. J. Duveneck, K. F. Lambert, K. A. Theoharides, and J. R. Thompson. 2019.  
853 Perspectives of resource management professionals on the future of New England's  
854 landscape: Challenges, barriers, and opportunities. *Landscape and Urban Planning* 188.  
855 McBride, M. F., K. F. Lambert, E. S. Huff, K. A. Theoharides, P. Field, and J. R. Thompson. 2017.  
856 Increasing the effectiveness of participatory scenario development through codesign.  
857 *Ecology and Society* 22:art16.
- 858 McKenzie, P. F., M. J. Duveneck, L. L. Morreale, and J. R. Thompson. 2019. Local and global  
859 parameter sensitivity within an ecophysiological based forest landscape model.  
860 *Environmental Modelling and Software* 117:1–13.
- 861 Mladenoff, D. J., and H. S. He. 1999. Design, behavior and application of LANDIS, an object-  
862 oriented model of forest landscape disturbance and succession. *Spatial modeling of forest*  
863 *landscape change: approaches and applications. Papers presented at a symposium in*  
864 *Albuquerque, New Mexico, USA, 1997.:125–162.*
- 865 New England Forestry Foundation. 2017. Assessing the wood supply and investment potential  
866 for a New England engineered wood products mill.
- 867 Olofsson, P., C. E. Holden, E. L. Bullock, and C. E. Woodcock. 2016. Time series analysis of  
868 satellite data reveals continuous deforestation of New England since the 1980s.  
869 *Environmental Research Letters* 11:064002.
- 870 Pan, Y., R. A. Birdsey, J. Fang, R. Houghton, P. E. Kauppi, W. A. Kurz, O. L. Phillips, A. Shvidenko,  
871 S. L. Lewis, J. G. Canadell, P. Ciais, R. B. Jackson, S. W. Pacala, A. D. McGuire, S. Piao, A.  
872 Rautiainen, S. Sitch, and D. Hayes. 2011. A large and persistent carbon sink in the world's  
873 forests. *Science* 333:988–993.
- 874 Pearman-Gillman, S. B., M. J. Duveneck, J. D. Murdoch, and T. M. Donovan. 2020a. Drivers and  
875 Consequences of Alternative Landscape Futures on Wildlife Distributions in New England,  
876 United States. *Frontiers in Ecology and Evolution* 8:164.
- 877 Pearman-Gillman, S. B., M. J. Duveneck, J. D. Murdoch, and T. M. Donovan. 2020b. Wildlife  
878 resistance and protection in a changing New England landscape. *PLOS ONE* 15:e0239525.
- 879 Popp, A., F. Humpenöder, I. Weindl, B. L. Bodirsky, M. Bonsch, H. Lotze-Campen, C. Müller, A.  
880 Biewald, S. Rolinski, M. Stevanovic, and J. P. Dietrich. 2014. Land-use protection for climate  
881 change mitigation. *Nature Climate Change* 4:1095–1098.
- 882 Puhlick, J., C. Woodall, and A. Weiskittel. 2017. Implications of land-use change on forest  
883 carbon stocks in the eastern United States. *Environmental Research Letters* 12:024011.
- 884 Le Quéré, C., R. M. Andrew, P. Friedlingstein, S. Sitch, J. Pongratz, A. C. Manning, J. Ivar  
885 Korsbakken, G. P. Peters, J. G. Canadell, R. B. Jackson, T. A. Boden, P. P. Tans, O. D.  
886 Andrews, V. K. Arora, D. C. E. Bakker, L. Barbero, M. Becker, R. A. Betts, L. Bopp, F.  
887 Chevallier, L. P. Chini, P. Ciais, C. E. Cosca, J. Cross, K. Currie, T. Gasser, I. Harris, J. Hauck, V.  
888 Haverd, R. A. Houghton, C. W. Hunt, G. Hurtt, T. Ilyina, A. K. Jain, E. Kato, M. Kautz, R. F.  
889 Keeling, K. Klein Goldewijk, A. Körtzinger, P. Landschützer, N. Lefèvre, A. Lenton, S. Lienert,  
890 I. Lima, D. Lombardozzi, N. Metz, F. Millero, P. M. S. Monteiro, D. R. Munro, J. E. M. S.  
891 Nabel, S. I. Nakaoka, Y. Nojiri, X. Antonio Padin, A. Peregón, B. Pfeil, D. Pierrot, B. Poulter,  
892 G. Rehder, J. Reimer, C. Rödenbeck, J. Schwinger, R. Séférian, I. Skjelvan, B. D. Stocker, H.  
893 Tian, B. Tilbrook, F. N. Tubiello, I. T. V. Laan-Luijckx, G. R. V. Werf, S. Van Heuven, N. Viovy,  
894 N. Vuichard, A. P. Walker, A. J. Watson, A. J. Wiltshire, S. Zaehle, and D. Zhu. 2018. Global  
895 Carbon Budget 2017. *Earth System Science Data* 10:405–448.

- 896 Reinmann, A. B., L. R. Hutyra, A. Trlica, and P. Olofsson. 2016. Assessing the global warming  
897 potential of human settlement expansion in a mesic temperate landscape from 2005 to  
898 2050. *Science of the Total Environment* 545–546:512–524.
- 899 Russell, M. B., C. W. Woodall, S. Fraver, A. W. D’Amato, G. M. Domke, and K. E. Skog. 2014.  
900 Residence Times and Decay Rates of Downed Woody Debris Biomass/Carbon in Eastern US  
901 Forests. *Ecosystems* 17:765–777.
- 902 Scheller, R. M. 2020. LANDIS-II Biomass Community Output v2.0.
- 903 Scheller, R. M., J. B. Domingo, B. R. Sturtevant, J. S. Williams, A. Rudy, E. J. Gustafson, and D. J.  
904 Mladenoff. 2007. Design, development, and application of LANDIS-II, a spatial landscape  
905 simulation model with flexible temporal and spatial resolution. *Ecological Modelling*  
906 201:409–419.
- 907 Schulp, C. J. E., G. J. Nabuurs, and P. H. Verburg. 2008. Future carbon sequestration in Europe-  
908 Effects of land use change. *Agriculture, Ecosystems and Environment* 127:251–264.
- 909 Sleeter, B. M., J. Liu, C. Daniel, B. Rayfield, J. Sherba, T. J. Hawbaker, Z. Zhu, P. C. Selmanns, and  
910 T. R. Loveland. 2018. Effects of contemporary land-use and land-cover change on the  
911 carbon balance of terrestrial ecosystems in the United States. *Environmental Research*  
912 *Letters* 13:045006.
- 913 Sleeter, B. M., T. L. Sohl, M. A. Bouchard, R. R. Reker, C. E. Soulard, W. Acevedo, G. E. Griffith, R.  
914 R. Sleeter, R. F. Auch, K. L. Sayler, S. Prisley, and Z. Zhu. 2012. Scenarios of land use and  
915 land cover change in the conterminous United States: Utilizing the special report on  
916 emission scenarios at ecoregional scales. *Global Environmental Change* 22:896–914.
- 917 Smith, J. E., L. S. Heath, K. E. Skog, and R. A. Birdsey. 2006. Methods for Calculating Forest  
918 Ecosystem and Harvested Carbon with Standard Estimates for Forest Types of the United  
919 States. USDA Northern Research Station General Te:216.
- 920 Stocker, T. F., D. Qin, G.-K. Plattner, M. M. B. Tignor, S. K. Allen, J. Boschung, A. Nauels, Y. Xia, V.  
921 Bex, and P. M. Midgley. 2013. *Climate Change 2013 The Physical Science Basis Working*  
922 *Group I Contribution to the Fifth Assessment Report of the Intergovernmental Panel on*  
923 *Climate Change* Edited by.
- 924 Stoner, A. M. K., K. Hayhoe, X. Yang, and D. J. Wuebbles. 2013. An asynchronous regional  
925 regression model for statistical downscaling of daily climate variables. *International*  
926 *Journal of Climatology* 33:2473–2494.
- 927 Thompson, J. R., C. D. Canham, L. Morreale, D. B. Kittredge, and B. Butler. 2017a. Social and  
928 biophysical variation in regional timber harvest regimes. *Ecological Applications* 27:942–  
929 955.
- 930 Thompson, J. R., D. N. Carpenter, C. V. Cogbill, and D. R. Foster. 2013. Four Centuries of Change  
931 in Northeastern United States Forests. *PLoS ONE* 8:e72540.
- 932 Thompson, J. R., J. Plisinski, K. Fallon Lambert, M. J. Duveneck, L. Morreale, M. McBride, M.  
933 Graham MacLean, M. Weiss, and L. Lee. 2020. Spatial simulation of co-designed land-cover  
934 change scenarios in New England: Alternative futures and their consequences for  
935 conservation priorities. *Earth’s Future*:e2019EF001348.
- 936 Thompson, J. R., J. S. Plisinski, P. Olofsson, C. E. Holden, and M. J. Duveneck. 2017b. Forest loss  
937 in New England: A projection of recent trends. *PLoS ONE* 12.
- 938 Williams, C. A., G. J. Collatz, J. Masek, and S. N. Goward. 2012. Carbon consequences of forest  
939 disturbance and recovery across the conterminous United States. *Global Biogeochemical*

940 Cycles 26:n/a-n/a.  
941 Woodall, C. W., J. W. Coulston, G. M. Domke, B. F. Walters, D. N. Wear, J. E. Smith, H. E.  
942 Andersen, B. J. Clough, W. B. Cohen, D. M. Griffith, S. C. Hagen, I. S. Hanou, M. C. Nichols,  
943 C. H. Perry, M. B. Russell, J. A. Westfall, B. T. Wilson, Woodall, Christopher W, Coulston,  
944 John W, Domke, Grant M, Walters, Brian F, Wear, David N, Smith, James E, Andersen,  
945 Hans-Erik, Clough, Brian J, Cohen, Warren B, Griffith, Douglas M, Hagen, Stephen C, Hanou,  
946 Ian S, Nichols, Michael C, Perry, Charles H, Russell, Matthew B, Westfall, James A, Wilson,  
947 and Barry T. 2015. The U.S. Forest Carbon Accounting Framework: Stocks and Stock  
948 Change, 1990-2016. Gen. Tech. Rep. NRS-154. Newtown Square, PA: U.S. Department of  
949 Agriculture, Forest Service, Northern Research Station. 49 p. 154:1–49.  
950 Zhu, Z., and C. E. Woodcock. 2014. Continuous change detection and classification of land cover  
951 using all available Landsat data. *Remote Sensing of Environment* 144:152–171.  
952  
953  
954

955 **APPENDICES**

956 APPENDIX I - NELF Scenario Creation and Land Cover Change Simulation

957 The NELF scenarios were developed using the intuitive logics 2-by-2 matrix approach,  
958 popularized by Royal Dutch Shell/Global Business Network (Bradfield et al. 2005). In a series of  
959 six one-day workshops held throughout New England, stakeholders were guided through a  
960 structured process to identify and agree upon two drivers of landscape change that they  
961 deemed to be the most impactful and uncertain. The extreme conditions of these two drivers  
962 were then used to create a matrix with four quadrants that correspond to four scenarios. The  
963 two drivers used to create the NELF scenarios were: Socio-economic connectedness (local to  
964 global) and natural resource innovation (low to high). After identifying the dominant drivers,  
965 the stakeholders built-out the scenarios, incorporating their subsidiary drivers and initial  
966 descriptions of land use, into ~1000-word narrative storylines; attributes of each scenario are  
967 shown in Figure 1. Participants were then presented with a summary of recent land-use trends  
968 and asked to describe how land use would differ in each of the alternative scenarios using  
969 semiquantitative terms. In the months following the workshops, the NELF team reconvened the  
970 stakeholders in a series of interactive webinars to define the amount, intensity, and geography  
971 of land cover change in the scenarios.

972 The New England Landcover Futures (NELF) scenarios narratives were then translated  
973 into quantitative rates of land cover change and simulated using a spatially explicit cellular  
974 automata model called Dinamica Environment for Geoprocessing Objects (Dinamica – EGO).  
975 Initially, the NELF Recent Trends scenario was parameterized using historical rates and patterns  
976 of land cover change from 1990-2010. These parameters were derived via classified remotely-  
977 sensed Landsat imagery, specifically a timeseries of land cover maps created using the  
978 Continuous Change Detection and Classification (CCDC) algorithm (Zhu and Woodcock 2014,  
979 Olofsson et al. 2016). The four stakeholder scenarios: Connected Communities, Yankee  
980 Cosmopolitan, Go it Alone, and Growing Global were also simulated with Dinamica - EGO, and  
981 were based on modifications to the rates and spatial allocation of land cover transitions in the  
982 Recent Trends scenario. For more information on how the Dinamica - EGO model operates, see  
983 Thompson et al. 2017b. For more information how the NELF scenario narratives were  
984 translated into model inputs, see Thompson et al. 2020.

985

986



987 APPENDIX II – Defining harvest prescriptions

988 Harvest prescriptions and rates were initially based on the continuation of ‘recent  
 989 trends’ in harvesting, following on the work done by Duveneck and Thompson (2019) alongside  
 990 forestry professionals. Additional harvest prescriptions were defined based on the specific  
 991 scenario narratives and current practices in forestry (Table A1 and A2). Scenario narratives  
 992 were translated from stakeholder quotes to both new prescriptions, as well as changes in  
 993 overall rates of harvesting and spatial allocation of harvesting (Table A2). Please see Appendix  
 994 III for the rates and spatial allocation of harvests.

995

996 Table A1. Harvest prescription descriptions.

| <b>Harvest prescription</b> | <b>Definition</b>                                                                                                                                                                                                                                                                                                 |
|-----------------------------|-------------------------------------------------------------------------------------------------------------------------------------------------------------------------------------------------------------------------------------------------------------------------------------------------------------------|
| <b>Clear cut - all</b>      | All cohorts of all species are harvested, (the most intensive harvest prescription). The site must not have been cut in the last ten years and must have a cohort at least 50 years old to be eligible.                                                                                                           |
| <b>Clear cut - most</b>     | 80% of cohorts less than 20 years old remain in the harvest area, while all other cohorts are removed. The site must not have been cut in the last ten years and must have a cohort at least 50 years old to be eligible.                                                                                         |
| <b>Shelterwood</b>          | Removing most of the cohorts (60% of all species >20 years of age) to regenerate species in partial shade. No species preference in the prescription. The site must not have been cut in the last ten years and must have a cohort at least 80 years old to be eligible.                                          |
| <b>High-grade</b>           | Only species of high value are 100% removed (see below for list) at varying ages depending on value, and all others are left. The site must not have been cut in the last ten years and have the most valuable species to be eligible.                                                                            |
| <b>Thin – even age</b>      | Higher intensity thinning that targets younger cohorts (<130 years old (y) removed at 30%), but all species equally. Older cohorts (>=130 y) are removed at lower intensities (5%). The site must not have been cut in the last ten years and have cohorts at least 40 years old to be eligible.                  |
| <b>Thin – uneven age</b>    | Lower intensity thinning that would incorporate primarily non-commercial harvests and treats all species equally. Younger cohorts (<130 y) are removed at 7%, and older cohorts (>=130 y) at 5%. Any site with at least one 30-year-old cohort is eligible.                                                       |
| <b>Biomass harvest*</b>     | All species are removed at 50% or higher, with all less-valuable species removed. The site must not have been cut in the last ten years and have cohorts at least 60 years old to be eligible. All removed biomass (minus the slash component) is allocated to the energy emissions category during C accounting. |
| <b>Cut/plant*</b>           | Total clear cut and plant loblolly pine ( <i>Pinus taeda</i> ) as a crop tree species. The site must not have been cut in the last ten years and have cohorts at least 60 years old to be eligible.                                                                                                               |

|                                                                                                                      |                                                                                                                                                                                                                                                                                                                                                                                                                                     |
|----------------------------------------------------------------------------------------------------------------------|-------------------------------------------------------------------------------------------------------------------------------------------------------------------------------------------------------------------------------------------------------------------------------------------------------------------------------------------------------------------------------------------------------------------------------------|
| <b>Ecological harvest – intense*</b>                                                                                 | Aims to retain older cohorts, create longer rotation periods, create structural (age) diversity and regenerate species with higher economic and ecological value (e.g. oaks, pines, sugar maple, fir, etc.). The intense prescription takes out a higher % of biomass on average to continue to provide timber in a high demand market.                                                                                             |
| <b>Ecological harvest – light*</b>                                                                                   | Aims to retain older cohorts, create longer rotation periods, create structural (age) diversity and regenerate species with higher economic and ecological value (e.g. oaks, pines, sugar maple, fir, etc.). The light prescription takes out a lower % biomass to retain more carbon on sight in scenarios where carbon is more important.                                                                                         |
| <b>Firewood cutting*</b>                                                                                             | Very low intensity cutting (5%) of slightly older (>40 year old) primarily hardwood species. Any site with at least one 40 year old cohort is eligible. All removed biomass (minus the slash component) is allocated to the energy emissions category for C accounting.                                                                                                                                                             |
| <b>Sugarbush*</b>                                                                                                    | The site must be at least 75% sugar maple that is at least 50 years old (tap-able trees start at around 10" and sugarbush should have at least 74 taps/ha; Ferrell, 2013). Everything except for 20% of sugar maples 50-80 years, half of the sugar maples from 20-50, and 80% of red maples over 50 years is removed. The site must not have been cut in the last ten years and have cohorts at least 50 years old to be eligible. |
| * indicates a specialized prescription that was created based on at least one of the alternative land use scenarios. |                                                                                                                                                                                                                                                                                                                                                                                                                                     |

997  
998  
999  
1000  
1001  
1002

Table A2. Representative quotes from stakeholder narratives and the implications for harvesting and carbon allocation. Most harvest implementations were given 40 years to ramp from the Recent Trends harvest rates to the envisioned 2060 harvest rates. Unless noted otherwise, changes to carbon allocation into new pools were implemented in year 10 of the simulation and then static for the remainder of the 50 years.

| Narrative Quotes (Stakeholders)                                                                                                                                                                                                                                                                                                                                                                                                           | Harvest Implementation                                                                                                                                                                                                                                                                                                      | Carbon Allocation                                                                                                                                                        |
|-------------------------------------------------------------------------------------------------------------------------------------------------------------------------------------------------------------------------------------------------------------------------------------------------------------------------------------------------------------------------------------------------------------------------------------------|-----------------------------------------------------------------------------------------------------------------------------------------------------------------------------------------------------------------------------------------------------------------------------------------------------------------------------|--------------------------------------------------------------------------------------------------------------------------------------------------------------------------|
|  <p><b>Connected Communities</b></p> <p>1. "...the use and protection of local resources increasingly important to governments and communities... there is a resurgence in community forests and woodlots near towns that are dedicated to producing high-value local wood products."</p> <p>2. "A regional carbon tax... helps to promote greater</p> | <p>1. Overall improvement in forest management. 60% reduction in rates of Clear cut - all and 40% reduction in High-grade and reallocated 80% to Ecological harvest – intense and 20% to Ecological harvest – light.</p> <p>2. A Biomass Harvest prescription is added with a pulse of the Biomass Harvest prescription</p> | <p>1. There is a 40% reduction in emitted with and without energy recaptures, as well as a 20% reduction in landfilling of carbon. The remaining carbon is "in use."</p> |

|                                                                                                                                                                                                                                                                                                                                                                                                                                                                                                                                                                                                                                                                                                                                                                                                                                                                                                                                                                                                                                                                                                                                                                               |                                                                                                                                                                                                                                                                                                                                                                                                                                                                                                                                                      |                                                                                                                                                                                                                                                                                                                                                 |
|-------------------------------------------------------------------------------------------------------------------------------------------------------------------------------------------------------------------------------------------------------------------------------------------------------------------------------------------------------------------------------------------------------------------------------------------------------------------------------------------------------------------------------------------------------------------------------------------------------------------------------------------------------------------------------------------------------------------------------------------------------------------------------------------------------------------------------------------------------------------------------------------------------------------------------------------------------------------------------------------------------------------------------------------------------------------------------------------------------------------------------------------------------------------------------|------------------------------------------------------------------------------------------------------------------------------------------------------------------------------------------------------------------------------------------------------------------------------------------------------------------------------------------------------------------------------------------------------------------------------------------------------------------------------------------------------------------------------------------------------|-------------------------------------------------------------------------------------------------------------------------------------------------------------------------------------------------------------------------------------------------------------------------------------------------------------------------------------------------|
| <p>reliance on local food, local wood products and local transportation options during the early 2020s and 2030s, with local wood biomass serving as a renewable transition fuel.”</p> <p>3. “...timber harvesting rates across the region increase by 50% by 2060, particularly in the northern New England states.”</p>                                                                                                                                                                                                                                                                                                                                                                                                                                                                                                                                                                                                                                                                                                                                                                                                                                                     | <p>implemented during timesteps 10 and 20, additional to the baseline harvest rates. The pulse is implemented by multiplying baseline Biomass Harvest rates by 1.5 in times 10 and 20.</p> <p>3. Regional increase in total harvested area to 150% of RT in timestep 50. Increase more in the north than the south.</p>                                                                                                                                                                                                                              | <p>2. 100% of wood harvested from the biomass harvest prescriptions goes to emissions with energy recapture.</p>                                                                                                                                                                                                                                |
|  <p><b>Yankee Cosmopolitan</b></p> <p>1. “Abundant forests remain a central part of New England’s identity, and support increases in tourism, particularly in Vermont, Maine, and New Hampshire... and carbon storage by forests is now highly valued.”</p> <p>2. “Rates of timber harvesting for wood products have decreased in the region, particularly in southern New England where parcelization and non-timber forest values drive land management priorities.”</p> <p>3. “Technological innovations in energy generation and storage limit the demand for wood biomass energy.”</p> <p>4. “Development of sugar bushes has expanded as maple syrup has become a valuable global commodity and New England remains suitable for sugar maple trees despite changing climate.”</p> <p>5. “...forestry practice laws designed to protect a range of ecosystem services have become more stringent in all states and the limited harvesting that occurs follows an ‘ecological forestry’ paradigm, including longer rotations with more leave trees and slash left on-site to balance</p> | <p>1. Overall reduction in harvesting across New England.</p> <p>2. Reduce overall harvesting, slightly more in southern NE than northern states. See table A5 for exact rates.</p> <p>4. Take 1% out of each of the other harvest prescriptions to make a Maple Sugar prescription.</p> <p>5. Rapid increase in Ecological Harvest prescriptions across NE. 90% of remaining harvest (after the sugarbush allocation) reallocated, 30% into Ecological Harvesting – intense and 70% into Ecological Harvesting – light by 2040 (ramped evenly).</p> | <p>3. By 2060, 2/3 of the emissions do not have energy recapture. Linear replacement of emitted with energy recapture to emitted without energy recapture.</p> <p>5. Slash left on site increases by 50%. There is a 20% reduction in both types of emissions, with a 10% reduction in landfilling of carbon. Remaining carbon is “in use”.</p> |

|                                                                                                                                                                                                                                                                                                                                                                                                                                                                                                                                                                                                                                                                                                                                                                                                                  |                                                                                                                                                                                                                                                                                                                                                                                                                                                                                                                                                                                                                                                                                                                                                                                                   |                                                                                                                                                                                                                                                                                                                                                                                                                        |  |
|------------------------------------------------------------------------------------------------------------------------------------------------------------------------------------------------------------------------------------------------------------------------------------------------------------------------------------------------------------------------------------------------------------------------------------------------------------------------------------------------------------------------------------------------------------------------------------------------------------------------------------------------------------------------------------------------------------------------------------------------------------------------------------------------------------------|---------------------------------------------------------------------------------------------------------------------------------------------------------------------------------------------------------------------------------------------------------------------------------------------------------------------------------------------------------------------------------------------------------------------------------------------------------------------------------------------------------------------------------------------------------------------------------------------------------------------------------------------------------------------------------------------------------------------------------------------------------------------------------------------------|------------------------------------------------------------------------------------------------------------------------------------------------------------------------------------------------------------------------------------------------------------------------------------------------------------------------------------------------------------------------------------------------------------------------|--|
| <p>carbon storage with commodity production.”</p>                                                                                                                                                                                                                                                                                                                                                                                                                                                                                                                                                                                                                                                                                                                                                                |                                                                                                                                                                                                                                                                                                                                                                                                                                                                                                                                                                                                                                                                                                                                                                                                   |                                                                                                                                                                                                                                                                                                                                                                                                                        |  |
|  <p><b>Growing Global</b></p> <p>1. “The growth of the national housing market has led to an increase in the area of forestland that is harvested each year. This growth largely occurs in rural areas.”</p> <p>2. “In the northern states large-scale industrial forest management and clear-cutting rates have increased... rising property values and associated new development has driven forestry out of southern New England.”</p> <p>3. “Warmer growing conditions have led to experimentation with fast-growing softwoods such as loblolly and southern pine plantation forestry.”</p> <p>4. “Conventional forestry has increased commensurate with expanded biofuel markets, often harvesting low value species.”</p> | <p>1. Overall increase in harvesting, shifting to northern states (which are generally more rural).</p> <p>2. Harvest increases in corporate ownerships by +20% (equally taken from other ownership classes) in nNH, nVT, and ME. Clear cut – all and Clear cut – most up by 20% in nVT, nNH, and ME and up 10% in all other states (reallocated equally from the other harvest prescriptions).</p> <p>3. Pine plantations are planted at small quantities. 1% out of all other harvest prescriptions is reallocated to a new Cut/plant prescription.</p> <p>4. Increase biomass harvesting prescription. Reallocate 90% of the High-grade prescription to Biomass harvest, reallocate 10% of Thin – even age to Biomass harvest, and reallocate 10% of Thin – uneven age to Biomass harvest.</p> | <p>1. 20% increase in “in use” C, removed from the two emissions categories equally.</p> <p>4. 100% of wood harvested from the biomass harvest prescriptions goes to emissions with energy recapture.</p>                                                                                                                                                                                                              |  |
|  <p><b>Go It Alone</b></p> <p>1. “...the region has seen the significant degradation of ecosystem services as a result of poor planning, increased pollution, and heavy extractive uses of local resources using conventional technologies... There are few incentives to practice long-term silviculture.”</p> <p>2. “...timber harvesting rates have increased dramatically, precipitated by the need to use local resources for energy.”</p> <p>3. “...and forests are heavily utilized for biomass energy, mostly for conventional firewood.”</p>                                                                                                                                                                         | <p>1. Total harvest area and intensity both increases. See table for area increase. To increase intensity: reallocate 25% of Thin – uneven age to Clear cut – all and Biomass harvest (split evenly), and reallocate 25% of Thin – even age to Clear cut – all and Biomass harvest (split evenly).</p> <p>2. Reallocate 90% of High-grade to Biomass harvest.</p> <p>3. Create a firewood prescription that is a relatively intensive prescription. Take 5% out of each of the other harvest prescriptions to make Firewood Rx prescription for all ownerships.</p>                                                                                                                                                                                                                               | <p>1. 50% of “in use” carbon is reallocated into the other categories, 30% into landfills, 20% into emissions with energy recapture, and 50% into emissions (without energy recapture).</p> <p>2. 100% of wood harvested from the biomass harvest prescriptions goes to emissions with energy recapture.</p> <p>3. 100% of wood harvested from the firewood prescriptions goes to emissions with energy recapture.</p> |  |

|                                                                                                                                                                                                    |                                                                                                                                             |  |  |  |
|----------------------------------------------------------------------------------------------------------------------------------------------------------------------------------------------------|---------------------------------------------------------------------------------------------------------------------------------------------|--|--|--|
| 4. "The management and maintenance of TIMO and corporate forestry lands has declined because it is too expensive to harvest and transport wood products to distant population and energy centers." | 4. Harvesting decreases in corporate lands, but is made up in increased harvesting by FFOs. Reallocate 50% of corporate harvesting to FFOs. |  |  |  |
| *Unless otherwise stated, harvest rates and prescriptions and carbon storage allocation stay consistent with recent trends carbon storage partitioning.                                            |                                                                                                                                             |  |  |  |

1003  
1004  
1005

1006 APPENDIX III – Harvest rates by management area and ownership class

1007 Initial harvest rates were calculated using remeasured FIA plots within each of our management  
 1008 areas. Management areas were first defined by location/region and then ownership class,  
 1009 where regions were defined as states, with the exception of New Hampshire and Vermont,  
 1010 where the FIA definitions of northern and southern parts of the state were used since harvest  
 1011 regimes were different enough to warrant separate analyses. Next we simplified the FIA  
 1012 ownership classes (Table A3) to calculate the annual probability of harvest and harvest percent  
 1013 within each management area (as defined by region and ownership class), following methods  
 1014 used in Thompson et al. (2017a). The annual probability of harvest for each management area  
 1015 was calculated using the proportion of plots harvested, according to the FIA database, in the  
 1016 last three measurement periods (approx. 2000-2018) and the years between remeasurements  
 1017 to calculate an annual probability of harvest within each region and ownership class. We then  
 1018 calculated the average intensity of harvest by calculating the percent of the total biomass  
 1019 removed for those plots with a harvest within each management area. We then combined the  
 1020 annual probabilities and intensities of harvest in management areas with too few FIA plots  
 1021 (<100, with the exception of FFOs in RI), to the geographically nearest neighboring  
 1022 management area of the same ownership type with the most similar average harvesting  
 1023 probability and intensity (Table A4).

1024  
 1025 Table A3. Crosswalk between FIA ownership classes to our simplified ownerships for creating  
 1026 management areas. Note that final Management Areas for LANDIS-II included conservation  
 1027 status as well.

| OWNCD | FIA ownership class                                            | Management areas | Name          |
|-------|----------------------------------------------------------------|------------------|---------------|
| 41    | corporate                                                      | CO               | Corporate     |
| 42    | NGO, natural resources organization                            | FF               | Family Forest |
| 43    | unincorporated local partnership/club                          | LO               | Local         |
| 44    | Native American                                                | FF               | Family Forest |
| 45    | Individual                                                     | FF               | Family Forest |
| 11    | National Forest                                                | FE               | Federal       |
| 12    | National Grassland and/or Prairie                              | FE               | Federal       |
| 13    | Other Forest Service Land                                      | FE               | Federal       |
| 21    | National Park Service                                          | FE               | Federal       |
| 22    | Bureau of Land Management                                      | FE               | Federal       |
| 23    | Fish and Wildlife Service                                      | FE               | Federal       |
| 24    | Departments of Defense/Energy                                  | FE               | Federal       |
| 25    | Other Federal                                                  | FE               | Federal       |
| 31    | State including State public universities                      | ST               | State         |
| 32    | Local (County, Municipality, etc.) including water authorities | LO               | Local         |
| 33    | Other Non-federal Public                                       | LO               | Local         |
| 46    | Undifferentiated private                                       | FF               | Family Forest |

1028  
 1029

1030 Table A4. FIA harvest intensities by management area

1031 Corporate owned forests

| <b>Region(s)</b>  | <b># of FIA plots (n)</b> | <b>Annual Probability of Harvest</b> | <b>Average Harvest Intensity</b> |
|-------------------|---------------------------|--------------------------------------|----------------------------------|
| <b>ME</b>         | 1953                      | 3.5%                                 | 45.1%                            |
| <b>nNH, nVT</b>   | 160                       | 3.5%                                 | 47.0%                            |
| <b>sNH, sVT</b>   | 121                       | 1.9%                                 | 24.3%                            |
| <b>CT, MA, RI</b> | 145                       | 0.92%                                | 28.5%                            |

1032

1033 Family owned forests

| <b>Region(s)</b> | <b># of FIA plots (n)</b> | <b>Annual Probability of Harvest</b> | <b>Average Harvest Intensity</b> |
|------------------|---------------------------|--------------------------------------|----------------------------------|
| <b>ME</b>        | 1327                      | 3.7%                                 | 29.0%                            |
| <b>nNH</b>       | 204                       | 2.8%                                 | 28.1%                            |
| <b>sNH</b>       | 322                       | 2.5%                                 | 14.2%                            |
| <b>nVT</b>       | 330                       | 2.8%                                 | 28.5%                            |
| <b>sVT</b>       | 265                       | 2.6%                                 | 22.8%                            |
| <b>MA</b>        | 337                       | 1.6%                                 | 17.0%                            |
| <b>CT</b>        | 225                       | 2.4%                                 | 11.2%                            |
| <b>RI</b>        | 88                        | 1.1%                                 | 19.0%                            |

1034

1035 Federally owned forests

| <b>Region(s)</b>            | <b># of FIA plots (n)</b> | <b>Annual Probability of Harvest</b> | <b>Average Harvest Intensity</b> |
|-----------------------------|---------------------------|--------------------------------------|----------------------------------|
| <b>All regions together</b> | 363                       | 0.61%                                | 37.4%                            |

1036

1037 Locally owned forests

| <b>Region(s)</b>              | <b># of FIA plots (n)</b> | <b>Annual Probability of Harvest</b> | <b>Average Harvest Intensity</b> |
|-------------------------------|---------------------------|--------------------------------------|----------------------------------|
| <b>ME, nNH, sNH, nVT, sVT</b> | 211                       | 3.0%                                 | 18.0%                            |
| <b>CT, MA, RI</b>             | 181                       | 1.2%                                 | 19.6%                            |

1038

1039 State owned forests

| <b>Region(s)</b> | <b># of FIA plots (n)</b> | <b>Annual Probability of Harvest</b> | <b>Average Harvest Intensity</b> |
|------------------|---------------------------|--------------------------------------|----------------------------------|
| <b>ME</b>        | 139                       | 1.8%                                 | 35.5%                            |

|                               |     |       |       |
|-------------------------------|-----|-------|-------|
| <b>nNH, sNH, nVT,<br/>sVT</b> | 102 | 0.78% | 30.7% |
| <b>CT, MA, RI</b>             | 174 | 1.0%  | 31.8% |

1040  
1041  
1042  
1043  
1044  
1045  
1046  
1047  
1048  
1049  
1050  
1051  
1052  
1053  
1054  
1055  
1056  
1057  
1058  
1059  
1060  
1061

These calculated annual probabilities of harvest were used as the harvest rates for each management area for the Recent Trends (RT) simulation. The average harvest intensities for each management area were used as the target average intensity of harvest for each management area. A linear programming method was used to balance the individual intensities of each of the harvest prescriptions so that the average harvest intensity for each management area was within 1% of the target average harvest intensity. Initial allocation of harvest proportions was based on the work of Belair and Ducey (2018), from which the linear programming method rebalanced the allocation to meet some given requirements and the target average harvest intensity. The harvest allocation models met the following requirements: (1) all harvest proportions together must be 100% of harvests for that management area; (2) different prescriptions could vary more than others (Clear cut – all (+20%, -10%), Thin – uneven age ( $\pm 20\%$ ), all others ( $\pm 5\%$ )), no harvest types could go to zero (lowest proportion = 0.1%), and no harvest types could go to 100%. All models converged.

Finally, the individual scenario narratives were used to alter both the harvest rates and intensities for each of the divergent scenarios. First, the overall target harvest area was either increased or decreased for each management area (Table A5) and then translated into new rates given the available area for harvest in each management area. Next, scenario descriptions were used to reallocate harvests in RT to different and/or newly defined harvest prescriptions specific to each scenario (Table A6).

Table A5. Target harvested area as a percent of area harvested in the RT scenario.

| <b>Scenario</b> | <b>Region</b>          | <b>Overall harvest area in 2060 as a % of RT</b> |
|-----------------|------------------------|--------------------------------------------------|
| <b>YC</b>       | ME, nNH, sNH, nVT, sVT | 60%                                              |
|                 | MA, CT, RI             | 40%                                              |
| <b>GG</b>       | ME                     | 250%                                             |
|                 | nNH, nVT               | 200%                                             |
|                 | sNH, sVT               | 150%                                             |
|                 | MA, CT, RI             | 50%                                              |
| <b>GA</b>       | All management areas   | 250%                                             |
| <b>CC</b>       | ME                     | 165%                                             |
|                 | nNH, sNH, nVT, sVT     | 140%                                             |
|                 | MA, CT, RI             | 115%                                             |

1062  
1063

Table A6. Target prescription allocations in the final year (2060)

| <b>Rx (weighted by area across all management areas)</b> | <b>RT year 50 (10 year % harv)</b> | <b>CC year 50 (10 year % harv)</b> | <b>YC year 50 (10 year % harv)</b> | <b>GG year 50 (10 year % harv)</b> | <b>GA year 50 (10 year % harv)</b> |
|----------------------------------------------------------|------------------------------------|------------------------------------|------------------------------------|------------------------------------|------------------------------------|
|                                                          |                                    |                                    |                                    |                                    |                                    |



|                                     |        |        |        |        |        |
|-------------------------------------|--------|--------|--------|--------|--------|
| <b>Clear cut - all</b>              | 2.73%  | 0.81%  | 0.16 % | 8.41%  | 10.50% |
| <b>Clear cut - most</b>             | 1.87%  | 0.56%  | 0.11%  | 6.52%  | 2.28%  |
| <b>High-grade</b>                   | 3.57%  | 0.32%  | 0.20%  | 0.72%  | 0.93%  |
| <b>Shelterwood</b>                  | 2.62%  | 3.92%  | 0.15%  | 5.37%  | 5.61%  |
| <b>Thin – even age</b>              | 5.77%  | 8.87%  | 0.33%  | 11.90% | 8.42%  |
| <b>Thin - uneven age</b>            | 11.83% | 17.83% | 0.67%  | 22.34% | 20.67% |
| <b>Biomass harvest</b>              | 0.00%  | 4.25%  | 0.00%  | 10.31% | 13.20% |
| <b>Cut/plant</b>                    | 0.00%  | 0.00%  | 0.00%  | 0.66%  | 0.00%  |
| <b>Ecological harvest – intense</b> | 0.00%  | 5.73%  | 4.41%  | 0.00%  | 0.00%  |
| <b>Ecological harvest - light</b>   | 0.00%  | 1.52%  | 10.29% | 0.00%  | 0.00%  |
| <b>Firewood cutting</b>             | 0.00%  | 0.00%  | 0.00%  | 0.00%  | 3.24%  |
| <b>Sugarbush</b>                    | 0.00%  | 0.00%  | 0.17%  | 0.00%  | 0.00%  |

1064

1065

1066 APPENDIX IV – Carbon allocation process

1067 Our harvested carbon accounting framework resulted in estimates of carbon emitted through  
1068 decomposition or combustion, emitted with energy recapture (e.g., used in energy generation),  
1069 still in use (e.g., in wood product such as building material), landfilled, and still in slash (not  
1070 decomposed yet) for the harvested carbon for the entire simulation. We only tracked the  
1071 carbon impacted by harvest during our simulation time period, from 2010-2060; therefore, any  
1072 carbon stored or emitted as a result of harvesting previous to 2010, or transitions that  
1073 happened after 2060 (e.g., from in-use to emitted), were not included in our accounting.

1074  
1075 Specifically, to partition removed growing stock carbon ( $GSC_R$ ; after slash removal) into saw  
1076 timber and pole timber, the forest type and hardwood/softwood specific values from Smith et  
1077 al., (2006; Table 4) were used in accordance with the following:

1078  
1079 Saw timber C =  $GSC_R \times \text{Sawtimber Fraction}$  Eq. 1

1080 Pole timber C =  $GSC_R \times (1 - \text{Sawtimber Fraction})$  Eq. 2

1081  
1082 Next, the appropriate values from Smith et al., (2006; Table 5) were used to partition the saw  
1083 timber and pole timber into saw log, pulp wood, bark and fuel wood using the following (also  
1084 with values specific to wood type):

1085  
1086 Saw log C = Saw timber C x Industrial roundwood:roundwood x  $(1 - (\text{bark:wood}/(1 +$   
1087 bark:wood))) Eq. 3

1088 Pulp wood C = Pole timber C x Industrial roundwood:roundwood x  $(1 - (\text{bark:wood}/(1 +$   
1089 bark:wood))) Eq. 4

1090 Saw log bark C = Saw timber C x Industrial roundwood:roundwood x  $(\text{bark:wood}/(1 +$   
1091 bark:wood)) Eq. 5

1092 Pulp wood bark C = Pole timber C x Industrial roundwood:roundwood x  $(\text{bark:wood}/(1 +$   
1093 bark:wood)) Eq. 6

1094 Fuel wood C = Saw timber C x  $(1 - \text{Industrial roundwood:roundwood}) + \text{Pole timber C x } (1 -$   
1095 Industrial roundwood:roundwood) Eq. 7

1096  
1097 Finally, decay rates for slash (Russell et al. 2014) and bark tables (Smith et al. 2006) were used  
1098 to allocate the removed wood to the final tracked carbon pools by time since removal, using  
1099 the following:

1100  
1101 In use  $C_t = (\text{Saw log C x Fraction in use}_t) + (\text{Pulp wood C x Fraction in use}_t)$  Eq. 8

1102 Landfill  $C_t = (\text{Saw log C x Fraction in landfill}_t) + (\text{Pulp wood C x Fraction in landfill}_t)$  Eq. 9

1103 Emitted with energy recapture  $C_t = (\text{Saw log C x Fraction emitted with energy recapture}_t) +$   
1104  $(\text{Pulp wood C x Fraction emitted with energy recapture}_t) + (\text{Saw log bark C x Proportion of}$   
1105  $\text{bark emitted with energy recapture}_t) + (\text{Pulp wood bark C x Proportion of bark emitted with}$   
1106  $\text{energy recapture}_t) + \text{Fuel wood C}$  Eq. 10

1107 Emitted  $C_t = (\text{Saw log C x Fraction emitted}) + (\text{Pulp wood C x Fraction emitted}) + (\text{Saw log}$   
1108  $\text{bark C x } (1 - \text{Proportion of bark emitted with energy recapture})) + (\text{Pulp wood bark C x } (1 -$

1109 Proportion of bark emitted with energy recapture)) + (Slash C x (1 – Fraction remaining as  
1110 slash)) Eq. 11

1111 Remaining Slash  $C_t = \text{Slash C} \times \text{Fraction remaining as slash}_t$  Eq. 12

1112

1113 Where  $t$  is the fraction allocated to each pool specific to the time since harvest. For example,  
1114 as time since harvest increases, the amount of the total removed carbon that is “in use”  
1115 decreases while the amount that is “emitted” or “landfilled” increases.

1116

1117 **APPENDIX V - Removed carbon allocation by carbon removal type by scenario**

1118 Each scenario had different carbon removal processes at play, resulting in different  
1119 contributions to both emissions and storage pools. Below is the breakdown of the removed  
1120 carbon in pools by time step, removal type, and scenario.

1121

1122 Figure A1. Removed carbon pools by removal type and scenario.

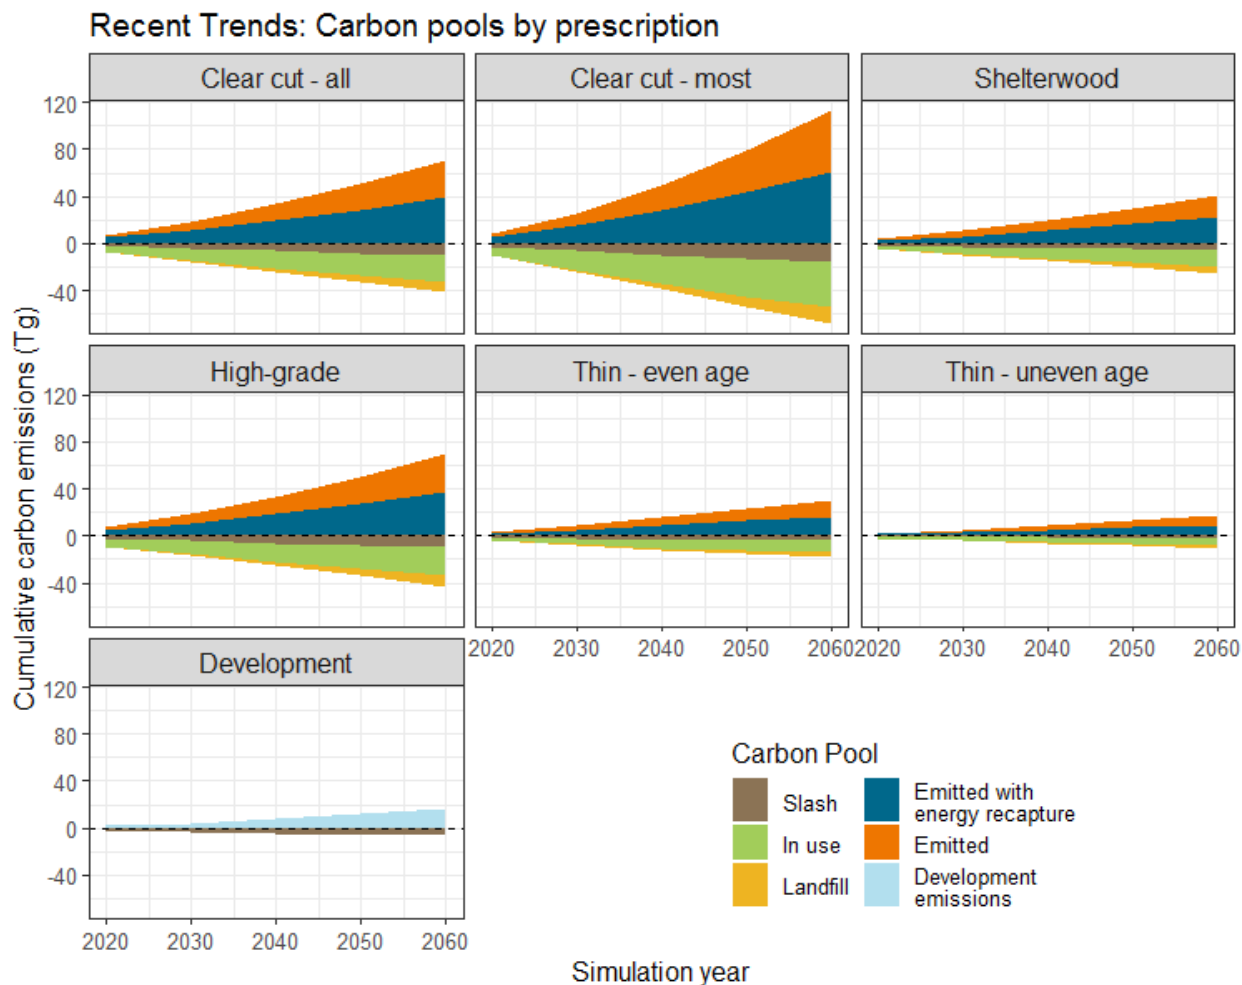

1123

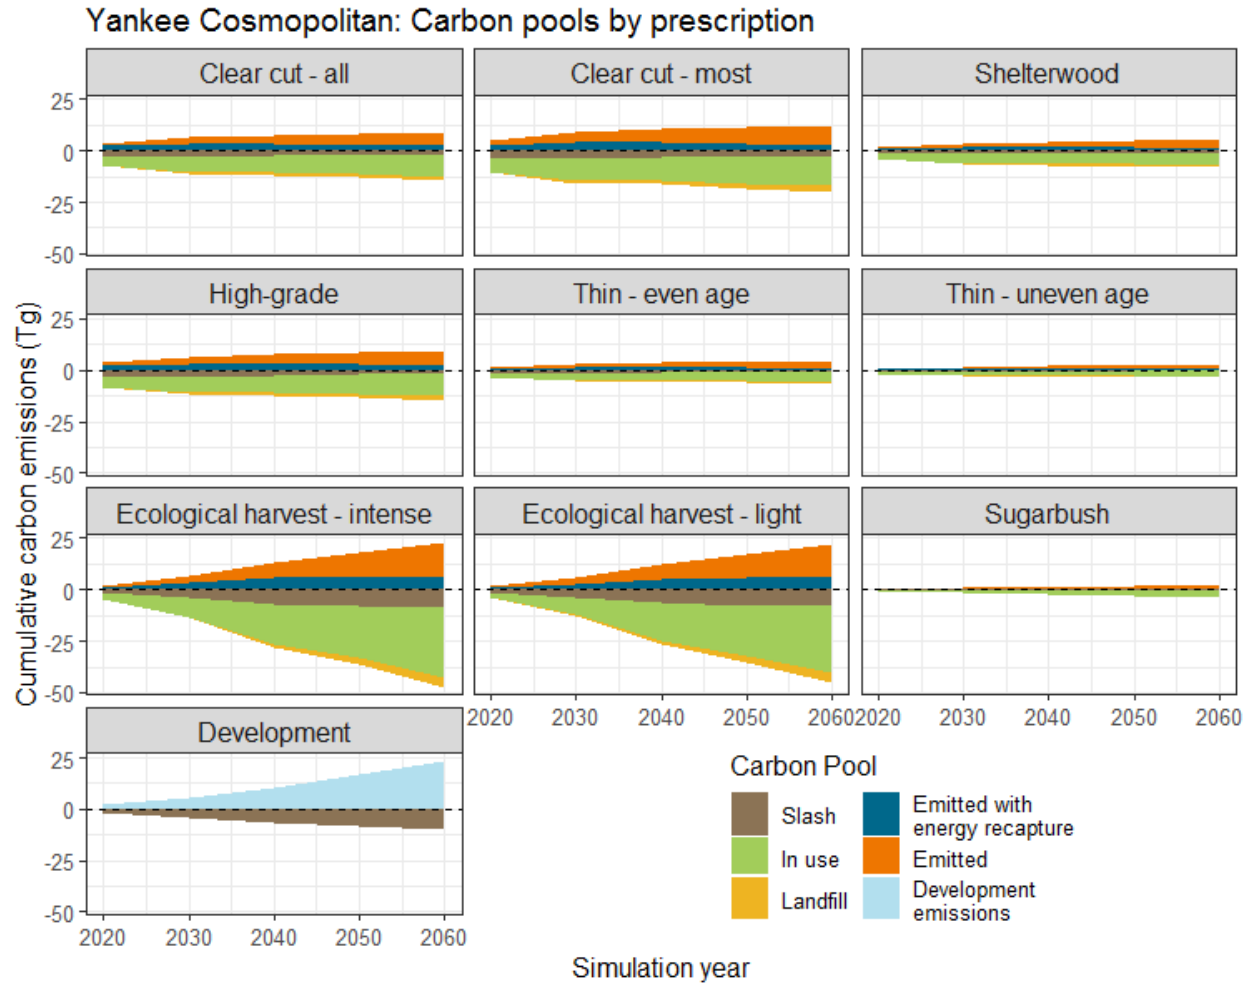

1124

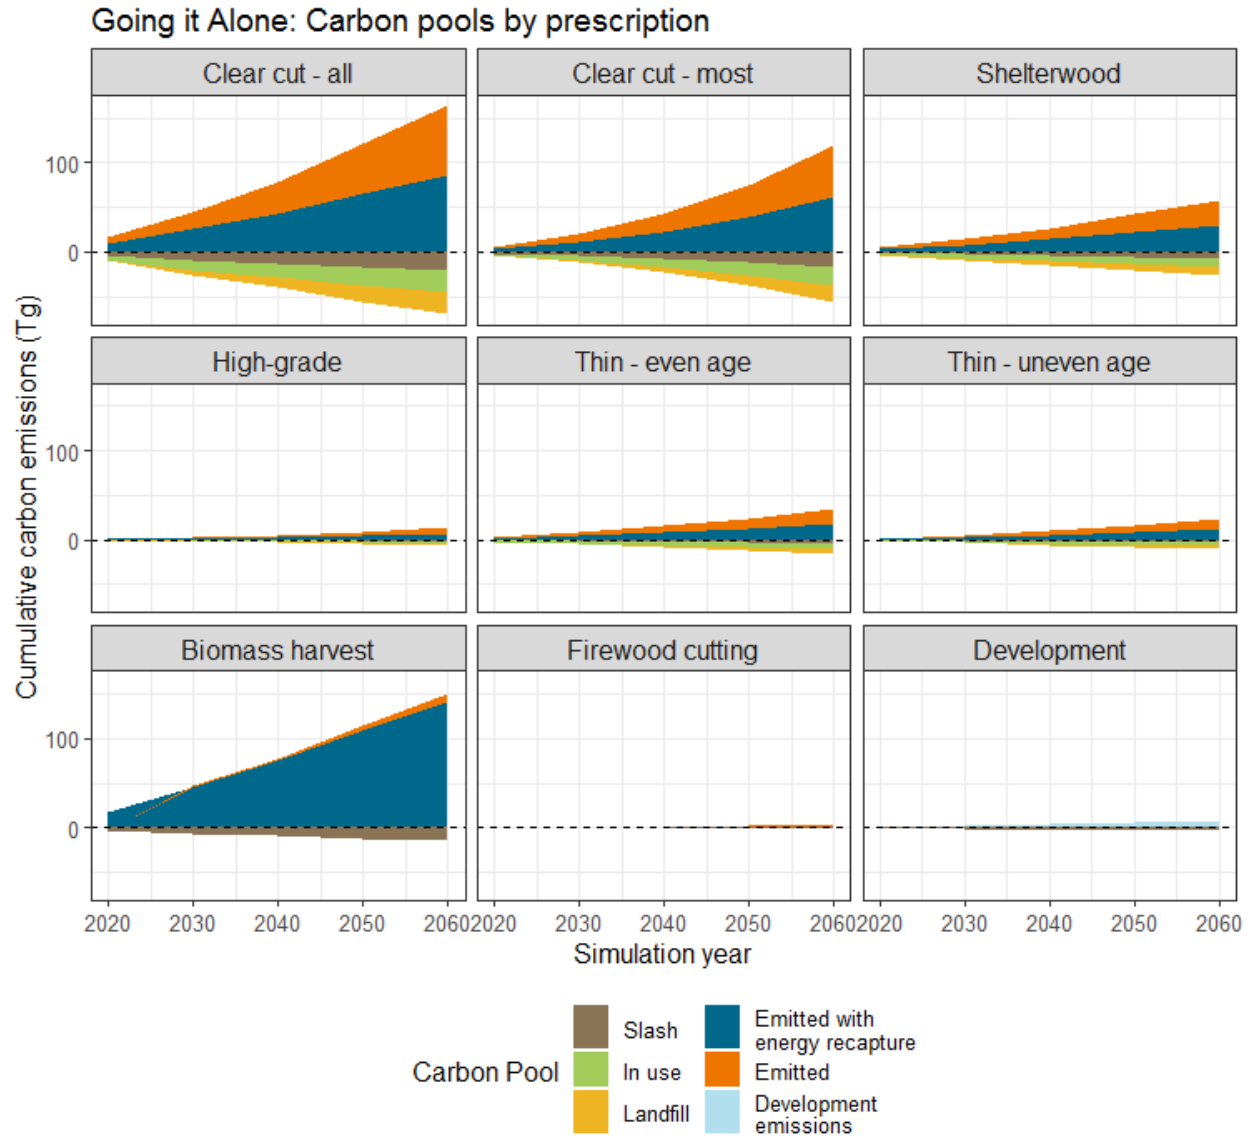

1125

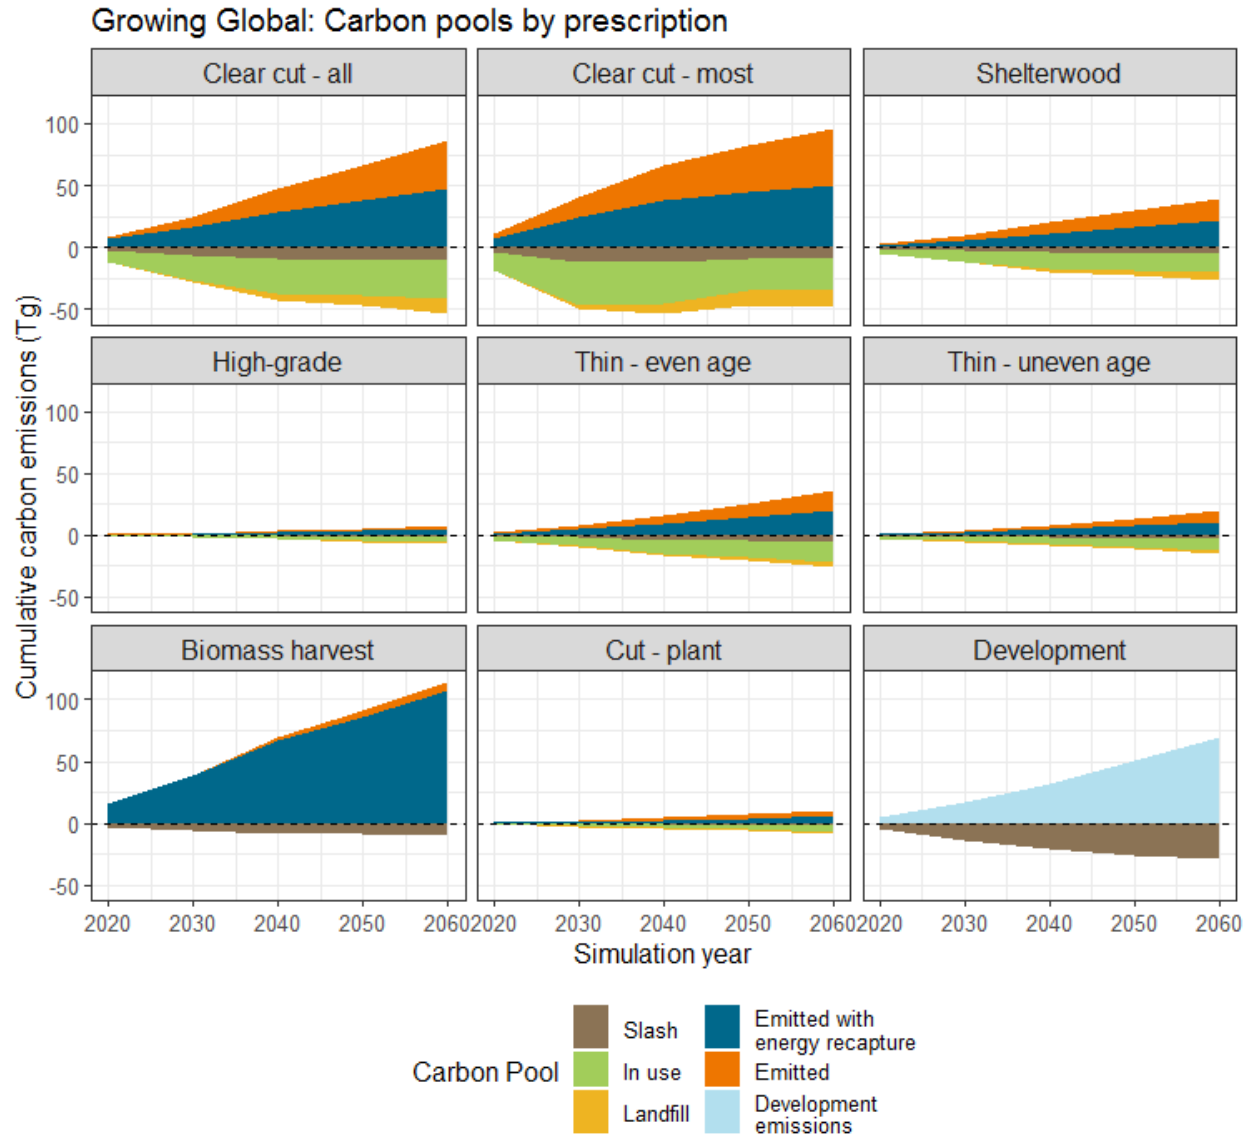

1126

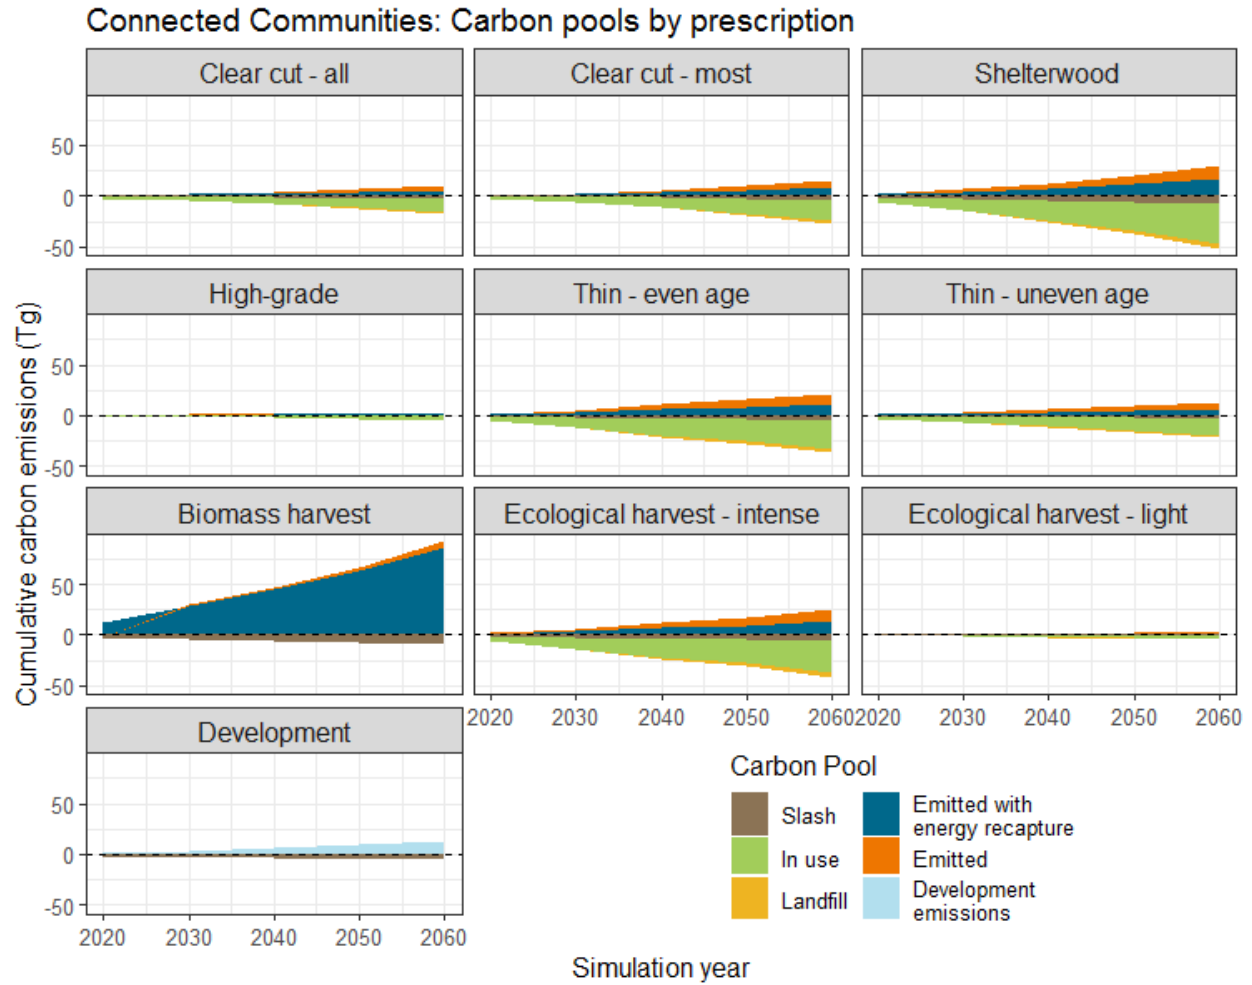

1127  
1128  
1129
